1 Long-range alteration of the physical environment mediates  
2 cooperation between *Pseudomonas aeruginosa* swarming  
3 colonies

4 Maxime Deforet<sup>1,\*</sup>

5 1. Sorbonne Université, Centre National de la Recherche Scientifique, Laboratoire Jean Perrin,  
6 LJP, Paris 75005, France;

7 \* E-mail: [maxime.deforet@sorbonne-universite.fr](mailto:maxime.deforet@sorbonne-universite.fr).

8 *Keywords: Pseudomonas aeruginosa, swarming, agar gel, surfactants, rhamnolipids.*

9 The author declares no conflict of interest.

## Abstract

10  
11 *Pseudomonas aeruginosa* makes and secretes massive amounts of rhamnolipid surfactants that enable swarming motility over biogel surfaces. But how this rhamnolipids interact with biogels to assist swarming remains unclear. Here I use a combination of optical techniques across scales and genetically-engineered strains to demonstrate that rhamnolipids can induce agar gel swelling over distances >10,000x the body size of an individual cell. The swelling front is on the micro-metric scale, and is easily visible using shadowgraphy. Rhamnolipid transport is not restricted to the surface of the gel, but occurs through the whole thickness of the plate and, consequently, the spreading dynamics depends on the local thickness. Surprisingly, rhamnolipids can cross the whole gel and induce swelling on the opposite side of a two-face Petri dish. The swelling front delimits an area where the mechanical properties of the surface properties are modified: water wets the surface more easily, which increases the motility of individual bacteria and enables collective motility. A genetically-engineered mutant unable to secrete rhamnolipids ( $\Delta rhlA$ ), and therefore unable to swarm, is rescued from afar with rhamnolipids produced by a remote colony. These results exemplify the remarkable capacity of bacteria to change the physical environment around them and its ecological consequences.

## Significance statement

26  
27 Living organisms have the ability to interact mechanically with their environment. *Pseudomonas*  
28 *aeruginosa*, a motile bacterium, can spread collectively on biogels, a behavior called swarming.  
29 Rhamnolipids, surfactant molecules *P. aeruginosa* make and secrete, are required for swarming.  
30 Here, I demonstrate rhamnolipids not only physically alter the biogel in the vicinity of the secreting cells, but also over distances much greater than the bacterial cell size, through gel swelling.  
31 This long-distance physical alteration can even rescue a remote colony which would not produce  
32 rhamnolipids. This work illustrates the remarkable ability of bacteria to change the mechanical  
33 property of the world surrounding them.  
34

## Introduction

35

36 Bacteria have a remarkable ability to change the world around them through their collective  
37 behaviors (Papenfort & Bassler, 2016; Mavridou *et al.*, 2018; Ratzke & Gore, 2018). Some of these  
38 changes are physical : bacteria interact mechanically with their environment Persat *et al.* (2015)  
39 and they are also able to feedback on the physical environment (Berk *et al.*, 2012; Chew *et al.*,  
40 2014; Tropini, 2021).

41 Petri dishes with an agar biogel are widely used to investigate collective bacterial motility  
42 and its interplay with other biological processes (Wadhwa & Berg, 2021). This approach was  
43 used to uncover chemotactic genes (Greenfield *et al.*, 2009; Colin *et al.*, 2021), mechanisms of  
44 action of pharmaceutical molecules (Mirzoeva *et al.*, 1997), evolutionary dynamics (Baym *et al.*,  
45 2016), quorum sensing (Daniels *et al.*, 2004; Kamatkar & Shrout, 2011), and other social behaviors  
46 of bacteria (Jeckel *et al.*, 2019; Badal *et al.*, 2021; Monaco *et al.*, 2022).

47 Agar gel serves as a physical and chemical substrate: cells are inoculated at the surface of the  
48 gel, they proliferate by consuming essential nutrients supplemented to the gel. In that regard, an  
49 agar plate is generally viewed as a passive element merely providing mechanical support, water,  
50 and nutrients. During colony growth, bacteria secrete osmolytes (exopolysaccharides), which  
51 draw water from the gel to equilibrate osmotic imbalance and contribute to colony swelling  
52 and expansion, in non-motile (Dilanji *et al.*, 2014; Seminara *et al.*, 2012) as well as in motile  
53 colonies (Ping *et al.*, 2014; Yang *et al.*, 2017; Rhodeland *et al.*, 2020; Ma *et al.*, 2021). While colony  
54 morphogenesis modeling attempts sometimes include nutrient and water depletion (Srinivasan  
55 *et al.*, 2019; Yan *et al.*, 2017), structural changes of agar gel are rarely considered.

56 In the case of the bacterium *Pseudomonas aeruginosa*, a common opportunistic pathogen,  
57 another gel modification needs to be considered: *P. aeruginosa* secretes rhamnolipids (Abdel-  
58 Mawgoud *et al.*, 2010), a family of glycolipid surfactants of strong interest in medicine (Thakur  
59 *et al.*, 2021) and industry (Varvaresou & Iakovou, 2015; Gudiña *et al.*, 2015), in particular for their  
60 antimicrobial properties, their capacity to emulsify oil and participate in bioremediation, and  
61 their good environmental compatibility and biodegradability. Secretion of rhamnolipids, under

62 metabolic control (Boyle *et al.*, 2015; Santamaria *et al.*, 2022), allows the colony to rapidly and  
63 collectively spread into a branched shape, a phenotype called swarming (Copeland & Weibel,  
64 2009; Kearns, 2010). Mutants that do not secrete rhamnolipids are unable to swarm (Caiazza  
65 *et al.*, 2005; Xavier *et al.*, 2011).

66 Rhamnolipids are secreted as a family of glycolipid molecules, made of one or two fatty  
67 acid chains (primarily 3-(3-hydroxyalkanoyloxy)alkanoic acid, HAA) associated with one or two  
68 rhamnose groups, called monorhamnolipids (mono-RLs) or dirhamnolipids (di-RLs) (Abdel-  
69 Mawgoud *et al.*, 2010). The contribution of each molecule to swarming motility has been ex-  
70 plored (Yeung *et al.*, 2009), but the literature is inconsistent: (Caiazza *et al.*, 2005) reported HAA is  
71 merely a wetting agent and a wild-type colony growing on a HAA-supplemented plate swarms  
72 normally. In contrast, (Tremblay *et al.*, 2007) showed HAA is a strong repellent for swarming  
73 colonies and a wild-type colony growing on a HAA-supplemented plate is inhibited. A recent  
74 report from the same group (Morin & Déziel, 2021) showed that mutants producing only HAA  
75 are still able to swarm and form branches. These conflicting data call for a deeper understanding  
76 of the mechanisms underlying rhamnolipids-assisted swarming motility, in particular about the  
77 exact contribution of HAA, mono-rhamnolipids, and di-rhamnolipids.

78 In the literature, two main mechanisms were suggested: (i) rhamnolipids increase wettability  
79 of the agar surface, (ii) they create gradients of surface tension that cause the colony to move  
80 outwards (Marangoni effect).

81 Due to their surfactant nature (Yang *et al.*, 2021), rhamnolipids are often said to *lubricate*  
82 *the surface* (Boyle *et al.*, 2015), *decrease friction against the gel* (Hölscher & Kovács, 2017), *act as a*  
83 *wetting agent* (Tremblay *et al.*, 2007), or *lower surface tension* (Yang *et al.*, 2017; Rütshlin & Böttcher,  
84 2020). Addition of synthetic surfactants to a swarming plate is known to greatly improve colony  
85 spreading dynamics (Pamp & Tolker-Nielsen, 2007; Yang *et al.*, 2017). Change of wettability,  
86 induced by biosurfactants, can even enable flow of bacterial suspension along solid surfaces and  
87 through unsaturated porous material (Yang *et al.*, 2021). It is clear the molecular details of the  
88 gel and in particular the gel surface are crucial factors in how the colony behaves: patterns  
89 and spreading rate depend on the hardness of the gel (via agar concentration) (Kamatkar &



90 Shrouf, 2011; Mattingly *et al.*, 2018), the method of gel preparation (Tremblay & Déziel, 2008),  
91 but also the choice of gelling agent (Morin & Déziel, 2021), as well as any modification of its  
92 viscoelastic properties with substances like mucin or carboxymethyl cellulose (Yeung *et al.*, 2012),  
93 or polyethylene oxide (Yang *et al.*, 2017).

94 Early works reported how surfactant-assisted spreading of abiotic liquid film could yield to  
95 branching. This has been explored on liquid and solid substrates (Matar & Troian, 1999; Matar &  
96 Craster, 2009), and was extended to the case of *P. aeruginosa* swarming colonies (Du *et al.*, 2011,  
97 2012; Fauvart *et al.*, 2012; Trinschek *et al.*, 2018). In those works, rhamnolipids were modeled  
98 as a thin film of insoluble surfactants secreted by the colony and diffusing at the surface of a  
99 gel. Differences of surfactant concentration inside and outside the colony yield to gradients of  
100 surface tension and induced a branching instability (a mechanism known as Marangoni effect).  
101 These modeling efforts ignored what was happening on the agar side, where a precursor film  
102 was sometimes observed. In particular, rhamnolipids are soluble in water (Abdel-Mawgoud  
103 *et al.*, 2009) and these molecules are substantially smaller than the agar gel pores. Therefore, they  
104 are expected to diffuse through the entire agar gel, a hydrogel, whose structure can be modified  
105 through swelling (Bibi *et al.*, 2019; Li *et al.*, 2021).

106 Last, the expansion of a *P. aeruginosa* swarming colony can be divided into two components:  
107 spreading outwards and branching. Different theories attempt to explain these distinct processes.  
108 It is believed that the outward spread is due to an osmotic influx of water and a rhamnolipid-  
109 induced increase in surface wettability. Branching, which was recently found to optimize colony  
110 growth (Luo *et al.*, 2021), may be caused by a rhamnolipid-induced Marangoni effect, or alter-  
111 natively by diffusion-limited growth or chemotaxis (Deng *et al.*, 2014; Givero *et al.*, 2015). In  
112 this context, the knowledge of the contribution of each rhamnolipid congeners (HAA, mono-  
113 rhamnolipids, di-rhamnolipids) to each mechanism is still very limited.

114 Here, I use a combination of imaging methods across scales to demonstrate that rhamnolipids  
115 secreted by the colony alter the physical properties of the agar gel, not only locally where they  
116 are secreted, but also all more widely around the bacteria. Moreover, their transport is not  
117 restricted to the surface. I find, instead, that the rhamnolipids imbibe the whole gel, which yields

118 to gel swelling with a sharp swelling front. Bulk transport of rhamnolipids directly affects the  
119 expansion rate of the region imbibed by rhamnolipids. Gel imbibition by rhamnolipids cover so  
120 large distances that rhamnolipid-deficient colonies can be remotely rescued. More generally, this  
121 is an example of the remarkable ability of bacteria to change the mechanical properties of the  
122 world surrounding them.

## 123 Experimental Procedures

### 124 *Bacterial strains and growth conditions*

125 The bacterial strain (*P. aeruginosa* laboratory strain PA14) and its mutants used in this study are  
126 described in Table 1. Bacterial cells were routinely grown in LB at 37°C with aeration. Swarming  
127 medium (2.37 M Na<sub>2</sub>HPO<sub>4</sub>, 1.81 M KH<sub>2</sub>PO<sub>4</sub>, 4.67 M NaCl, 1 mM MgSO<sub>4</sub>, 0.1 mM CaCl<sub>2</sub>, 5 g/L  
128 casamino acids (Bacto, BD)) was solidified with agar (Bacto, BD), following previously described  
129 recipes (Xavier *et al.*, 2011; Deforet *et al.*, 2014). Agar concentration, unless specified otherwise,  
130 is 0.5 % (w/v). Overnight culture of bacteria were washed twice in PBS and 2 μL of the washed  
131 suspension were used to inoculate a swarming plate in the center. The plates were then flipped  
132 and placed inside a 37°C microbiological incubator.  $\Delta rhIA:P_{BAD}rhIAB$  colonies were grown on  
133 1% L-arabinose swarming plates to induce expression of the *rhIA* gene and robust secretion of  
134 rhamnolipids.

| Strain                     | Reference                     |
|----------------------------|-------------------------------|
| <i>P. aeruginosa</i> PA14  | Schroth <i>et al.</i> (2018)  |
| $\Delta rhIA$              | Xavier <i>et al.</i> (2011)   |
| $\Delta rhIA:P_{BAD}rhIAB$ | Xavier <i>et al.</i> (2011)   |
| <i>rhIB</i> <sup>-</sup>   | Liberati <i>et al.</i> (2006) |
| <i>rhIC</i> <sup>-</sup>   | Liberati <i>et al.</i> (2006) |
| <i>flgK</i> <sup>-</sup>   | O'Toole & Kolter (1998)       |

Table 1: Strains used in this study

135

### *Whole swarming colony*

136 An automated device was built inside a microbiological incubator (Heratherm IGS 100, ThermoFisher Scientific), for fluorescence, shadowgraphy, and brightfield imaging of a 10-cm diameter Petri dish. A LED light source (pE-4000, Cooled, UK) was used for fluorescence excitation. A set of lenses and mirrors were used to bring an even illumination pattern onto the plate. A single LED light source (Thorlabs, USA) was positioned on one side of the chamber for shadowgraphy imaging (see Figure S1 for a schematic of the imaging device). Generic white LED strings (Mouser, France) were positioned above the plate for brightfield imaging. Images were acquired with a CMOS camera (Cellcam Centro, Cairn Research, UK) with a macro lens (Navitar MVL7000, Thorlabs, USA). A dual-band emission filter (59010m, Chroma, USA) was mounted between the camera and the lens, for green and red fluorescence imaging. All devices were controlled with  $\mu$ Manager (<http://www.micro-manager.org>).

147

### *Sessile droplets*

148 Plates and swarming colonies were prepared as explained above. Plates were taken out of the incubator and placed under a Axiozoom V16 microscope (Zeiss), set at the lowest magnification (field of view is 25.7x21.5mm), equipped with a CMOS camera (BlackFly S, FLIR, USA), and illuminated through a transilluminator (Zeiss) with a mirror position that mimics DIC illumination. 1  $\mu$ L droplets of swarming media (recipe identical to that of the swarming plate, but without agar) were deposited on the surface of the gel, either inside or outside the swelling front generated by the colony. A movie was recorded as tens of droplets were deposited. Footprint diameters were measured, immediately after deposition, using ImageJ.

156

### *Fluorescent bead tracking*

157 For quantifying gel swelling, 1  $\mu$ m fluorescent polystyrene beads (F13083, ThermoFisher Scientific) were added during the swarming plate preparation (final concentration of  $10^5$  beads/mL). Colony were grown inside a microscopy incubator (Oko-Lab, Italy), mounted an a IX-81 Olym-

160 pus inverted microscope, equipped with a LED light source (pE-4000, Cooled, UK). Images were  
161 taken with a 20x objective and a CMOS camera (BlackFly S, FLIR, USA), every minute, for 30  
162 minutes, while the swelling front was passing through the field of view (confirmed by phase-  
163 contrast imaging). Diffraction pattern detection, beads detection, tracking, and calculation of  
164 the vertical displacement were performed with custom-made routines in MATLAB (MathWorks,  
165 USA). Calibration between diffraction pattern radius and vertical position was done by taking a  
166 vertical stack of images.

### 167 *Profilometry*

168 Height profiles were measured with a Zegage Pro interferometry profilometer (Zygo) equipped  
169 with a 5x Michelson objective (Nikon). An acquisition took 5 seconds (for one field of view 2x2.7  
170 mm), and 20 positions were stitched together to reconstruct the whole height profile (Figure 1E).  
171 For Figure 5C, the profiles were measured when the diameter of the rhamnolipids-imbibed area  
172 was approximately 3 cm in diameter. Four positions were recorded per plate (the 4th roots of  
173 unity). Each profile was then measured perpendicularly to the swelling front. The  $X = 0$  location  
174 was identified as the inflection point of the profile. The reference height  $Z = 0$  was imposed at  
175 location  $X = -500 \mu\text{m}$  and  $X = -400 \mu\text{m}$ , which tilt-corrected the whole profile. Heights in  
176 Figure 5C were measured at  $X = 1000 \mu\text{m}$ . For Figure S5, a 3x3 stitch acquisition was performed  
177 5 minutes after the liquid was entirely absorbed by the gel.

### 178 *Stepwise substrate*

179 A 1.5 mm thick sheet of polydimethylsiloxane (PDMS) was made following standard protocol  
180 (RTV615A+B, 10:1, Momentive Performance Materials). A 1x2 cm slab was cut out of the PDMS  
181 sheet and was placed in a Petri dish. 20 mL of agar gel was then poured on top of the substrate,  
182 following usual swarming plate protocol.

183

### *Two-face Petri dish*

184 The bottom of a Petri dish was drilled with a 10-mm drill bit. Holes were deburred with a 13-mm  
185 drill bit. Dishes were sterilized in 70% ethanol. The bottom side of each hole was taped with a  
186 piece of Parafilm, which was peeled off after the agar gel was poured and solidified.

187

### *Single-cell motility*

188 A suspension of *ΔrhlA* cells growing in liquid swarming media was spun down. A 20 μL plastic  
189 pipette tip was used to sample cells from the pellet and to transfer cells onto the gel surface  
190 (approximately 2 mm from the swelling front identified in shadowgraphy). One second videos  
191 (46 frames-per-second) were acquired every 5 minutes, at 10x magnification, in phase contrast,  
192 with an IX-81 Olympus inverted microscope. Auto-focus was performed before each acquisition.  
193 Image analysis was performed independently for each video: Local density was measured on the  
194 first frame of the video, by thresholding the phase-contrast image, followed by local averaging.  
195 The Density Index, defined to be between 0 (no cell) and 1 (cells form a uniformly dark popu-  
196 lation) is therefore the proportion of neighboring pixels that contains cells. To evaluate motility,  
197 the difference between the maximum projection and the minimum projection across the time-  
198 stack yields to a map where pixels were bright if their grey values changed during the video.  
199 Then, a threshold was applied and the result was locally average to produce a map of Speed  
200 Index between 0 (no pixel change) and 1 (all pixels have change values). This coarse-grained  
201 quantification is valid as long as cells are not too dense and cells do not move too much during  
202 one video (therefore, the analysis was limited to the region of the field of view where cells did  
203 not pile up and only one-second long videos were considered). To check the robustness of the  
204 method, various thresholding values have been tried, without significantly affecting the results.

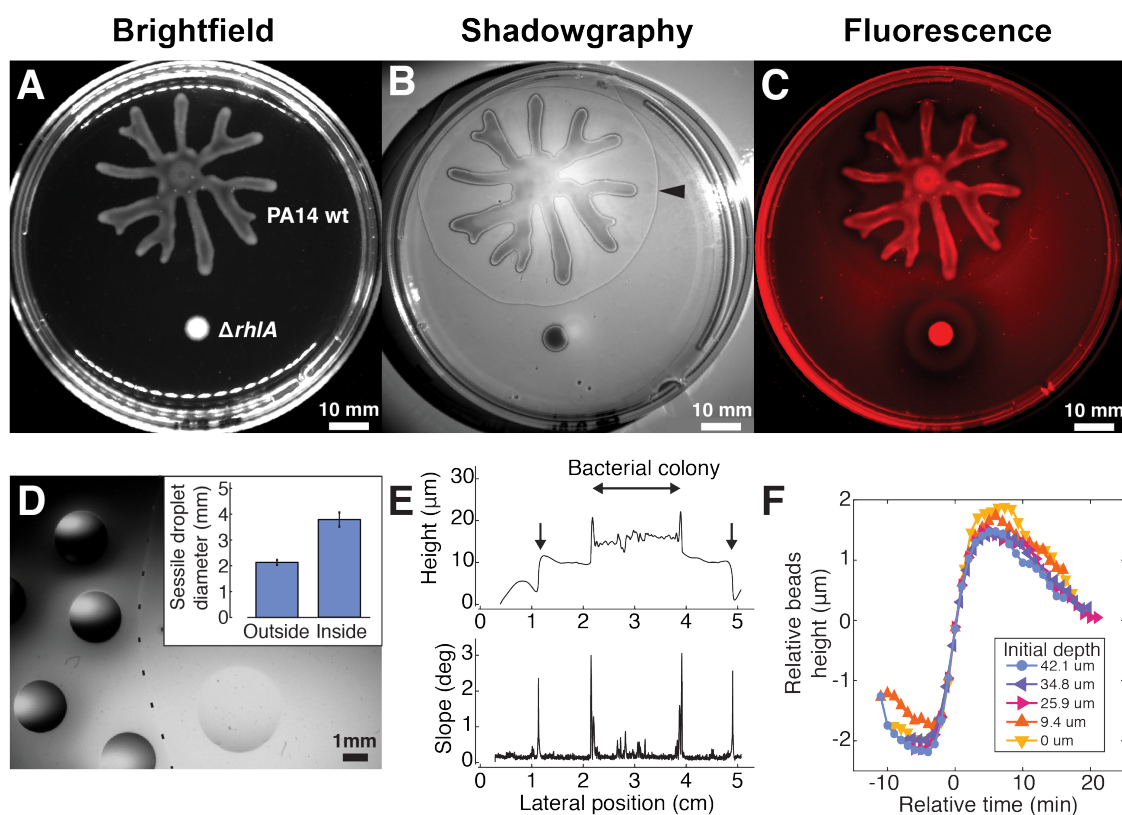

Figure 1: Rhamnolipids induce agar gel swelling. A-B-C: Wild-type *P. aeruginosa* and  $\Delta rhIA$  colonies were grown on an agar gel. The former swarmed out and formed a branched colony, whereas the latter did not swarm. A: Brightfield image. B: Shadowgraphy image reveals a darker line (depicted by a black arrowhead) that corresponds to a swelling front. C: Fluorescence image, for Nile Red imaging, confirms the darker line corresponds to a boundary of an area imbibed by rhamnolipids (see Figure S2 for a montage combining panels B and C). D: An illustrative micrograph showing the sessile droplets experiments. Dashed line depicts the swelling front. The source colony is on the right side. Inset: comparison of the wetting footprint radius in the two conditions. Error bars are standard deviation. E: Top: a height profile of a gel, obtained from optical interferometry. The downward arrows indicate the swelling front. Bottom: The local slope of the height profile. F: Vertical positions of fluorescent microbeads reveals gel swelling. The time axis for each trajectory is shifted using time synchronization from lateral displacement data (See Figure S3). Colors code for initial depth of each bead.

## Results

### *Rhamnolipids cause biogel swelling*

Wild-type *P. aeruginosa* colony spreads on soft agar by forming a branched colony, a behavior called swarming (Kearns, 2010). *rhlA*, a gene involved in production of rhamnolipids, is required for swarming: a  $\Delta rhlA$  colony, which does not produce rhamnolipids, is unable to swarm (Figure 1A). The presence of rhamnolipids around a colony has been revealed using methylene blue (Yeung *et al.*, 2009; Abdel-Mawgoud *et al.*, 2010). Shadowgraphy, a non-destructive, optical method that reveals non-uniformities in transparent media by casting a shadow onto a white background (Settles, 2001) (see Figure S1 for a schematic of the imaging device), confirmed that an area of the gel around the rhamnolipid-producing colony was modified: a thin darker line surrounded the colony (Figure 1B). Timelapse imaging confirmed this optical modification originated from the colony and propagates outward (See Movie S1). Since no modification emerged from a  $\Delta rhlA$  colony, I hypothesized variation of the optical properties of the gel were due to secretion of rhamnolipids.

Since rhamnolipids and some of their precursors are lipids, they could be localized using a lipid dye. Nile Red, whose emission spectrum depends on the polarity of the solvent (Teo *et al.*, 2021), was mixed to the agar gel during gel preparation (Morris *et al.*, 2011). Using fluorescence imaging to analyze solvent polarity around colonies, there was a distinct difference between wild-type and  $\Delta rhlA$  colonies, with a sharp variation coinciding with the darker line that surrounds the wild-type colony (Figure 1C and S2). This provides even stronger evidence that the darker line marks the rhamnolipid range. I also measured the wetting property of the gel surface by performing sessile droplets experiments (Banaha *et al.*, 2009; Santamaria *et al.*, 2022). Water droplets were deposited on each side of the darker line localized by shadowgraphy. On average, the droplet footprint radius was  $3.78 \pm 0.27$  (SD) mm on the colony side, and  $2.13 \pm 0.09$  (SD) mm on the other side (Figure 1D). Neglecting gravity and therefore assuming a spherical cap shape allow the calculation of contact angles of  $22.7^\circ$  and  $35.6^\circ$ , respectively. The wetting footprint size was found to be uniform on the colony side, independent of the distance to the colony or the



232 distance to the darker line. Similarly, the wetting footprint size was found to be uniform also  
233 outside the darker line. This confirms that the darker line marks a sharp limit of the rhamnolipid  
234 range, with surface properties that correlates with the presence of rhamnolipids. (Of note, the  
235 resolution of the sessile droplet experiment does not enable to measure the spatial distribution  
236 of rhamnolipid concentration, which was previously performed using LC/MS (Tremblay *et al.*,  
237 2007); the data merely demonstrate a contrast of concentration inside/outside the darker line.)

238 To understand the origin of the darker line visible in shadowgraphy, I had to first evaluate its  
239 3D profile. Using an optical profilometer (a device capable to measure 3D profile of a reflective  
240 surface with a nanometric resolution), I measured a jump of 8  $\mu\text{m}$ , with a maximal slope of  $3^\circ$   
241 (Figure 1E). The jump could emerge from two possible mechanisms: either it corresponds to a  
242 thick layer of rhamnolipid molecules covering the surface of the agar gel, as assumed by previous  
243 works (Fauvart *et al.*, 2012; Trinschek *et al.*, 2018), or alternatively rhamnolipids infiltrate the gel  
244 and the jump corresponds to a gel swelling front. I embedded micrometric fluorescent beads  
245 during preparation of the gel and performed 3D-tracking to follow each bead while the line  
246 passed through the field of view. If rhamnolipids cover the gel surface, beads should not move.  
247 If rhamnolipids diffuse through the gel and make it swell, beads should move up. Data shown in  
248 Figure 1F confirms a vertical movement of all the beads, synchronized with the passing line (see  
249 also Movie S2). The swelling amplitude was uniform across the first 50  $\mu\text{m}$  (optical limitations  
250 of fluorescence microscopy hamper deeper observations). Of note, beads also moved laterally  
251 with a similar amplitude: they first moved outwards and then inwards (this corresponds to a  
252 dilatation wave, see Figure S3 for more details). This confirms rhamnolipids make the agar gel  
253 swell over large distances, and the darker line corresponds to a swelling front that is so steep that  
254 it can be seen by a naked eye (Xavier *et al.*, 2011) and by shadowgraphy.

255 Shadowgraphy enables to locate the boundary of the rhamnolipid range on the plate, but it is  
256 unable to measure the spatial distribution of rhamnolipid congeners within the detected range.  
257 Yet, combining rhamnolipid mutants with shadowgraphy observations reveals information about  
258 the timing of secretion of various rhamnolipid congeners. I located the position of the swelling  
259 front with respect of time and this displayed two phases (Figure S4A): for the first 6 hours,



260 a swelling front emerged from the colony, traveled for 10 mm, and stalled. Then it regained  
261 speed and kept on traveling across the entire plate. I compared this evolution with that of two  
262 transposon mutants: the *rhlB*<sup>-</sup> mutant is unable to convert HAA into mono-rhamnolipids, and  
263 the *rhlC*<sup>-</sup> mutant is unable to convert mono-rhamnolipids into di-rhamnolipids (Abdel-Mawgoud  
264 *et al.*, 2010) (Figure S4B). The two phases were identified for the *rhlC*<sup>-</sup> plate too. In contrast,  
265 only the first phase was identified for the *rhlB*<sup>-</sup> plate, indicating the second phase was enabled  
266 by mono-rhamnolipids. Since a  $\Delta rhlA$  colony, unable to convert  $\beta$ -hydroxylacyl-ACP into HAA,  
267 does not generate any swelling front at all, I can estimate that the first phase is dominated by  
268 HAA (see the table in Figure S4D for a summary of these findings). In the rest of this work, all  
269 studied swelling fronts correspond to the second phase.

270 Finally, since mono- and di-rhamnolipids and HAA are surfactants (Deziel *et al.*, 2003; Abdel-  
271 Mawgoud *et al.*, 2010), I tested if their ability to swell agar gels was a generic feature of surfactant  
272 molecules. I tested Triton X-100, Tween 20, and Tween 80, nonionic surfactants, and SDS (Sodium  
273 dodecyl sulfate), a anionic surfactant. 3D profilometry and shadowgraphy confirmed that agar  
274 gel was swollen by synthetic surfactants, as well as the supernatant of the liquid culture of wild-  
275 type *P. aeruginosa* and *rhlC*<sup>-</sup>, but not after exposure to  $\Delta rhlA$  and *rhlB*<sup>-</sup> supernatant (Figure S5).

### 276 *Rhamnolipids imbibe the bulk of the gel, not the surface*

277 If transport of rhamnolipids is restricted to the gel surface, or if rhamnolipids diffuse through  
278 the gel following normal diffusion, their spreading rate should not depend on the local thickness  
279 of the gel. On the contrary, if Darcy's law governs rhamnolipids' transport, their spreading dy-  
280 namics should depend on the local section of the gel. I used gels with varying thicknesses to test  
281 this hypothesis and check whether rhamnolipids imbibed the whole gel or only the upper part.  
282 First, I used gels with stepwise thickness. I placed a thick inert obstacle at the bottom surface of  
283 the Petri dish and poured the agar gel on top of them. The thickness of obstacles (1.5 mm) was  
284 chosen to be smaller than the gel thickness (3.5 mm) to make sure the upper surface remained  
285 flat. To simplify the geometry of the system and keep a local source of rhamnolipids, I inocu-  
286 lated a non-motile mutant (*flgK*<sup>-</sup>) along a line. The swelling front coming out of the colony was

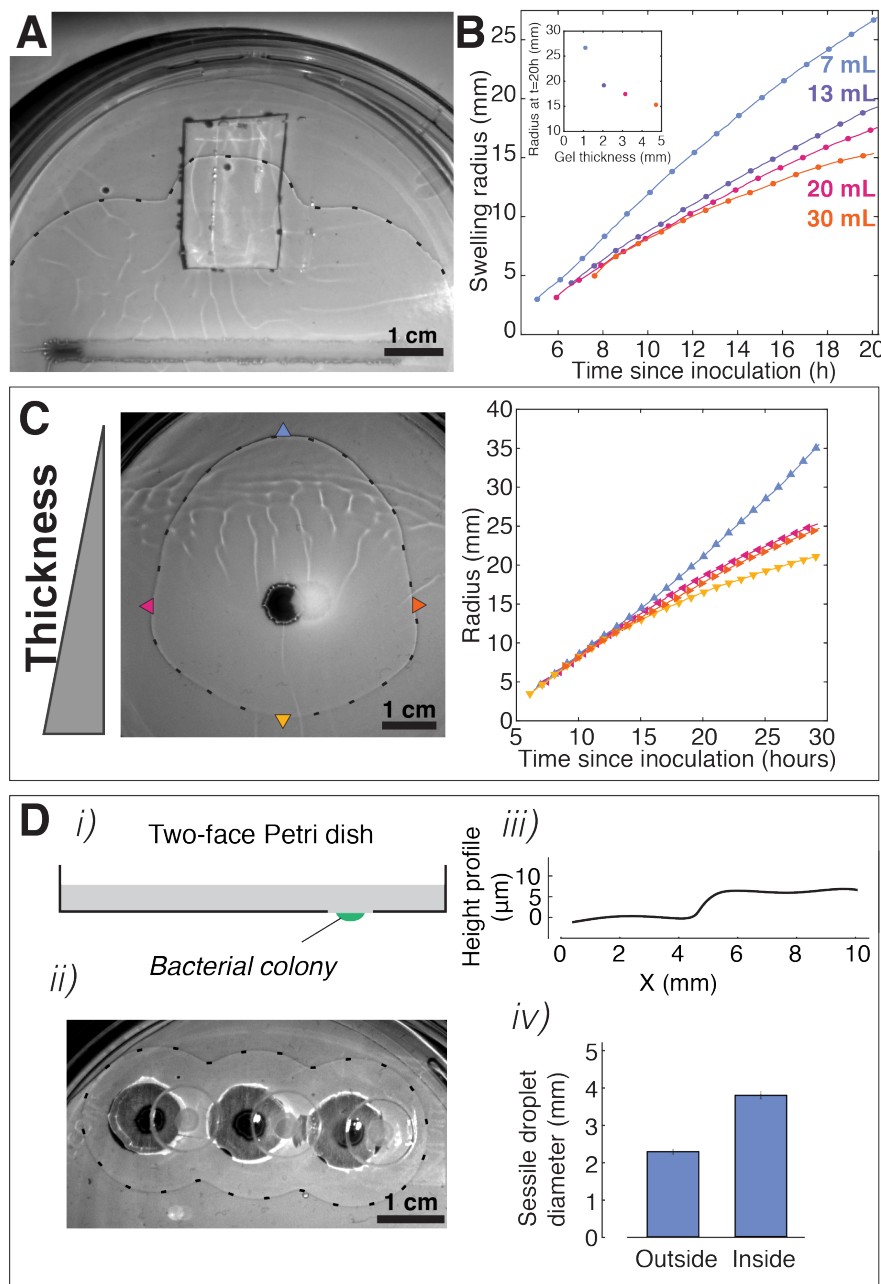

Figure 2: A: Snapshot of the swelling front on a plate with an obstacle. The non-motile colony, inoculated along a line, is visible near the bottom of the image. B: Positions of the swelling front as a function of time, for four plates with different thicknesses of gel. C: Left: Snapshot of the swelling front advancing on a tilted gel. Right: Positions of the swelling front as a function of time, for 4 locations depicted with arrowheads (top, bottom, left, and right). D: Two-face Petri dish confirms rhamnolipids spread through the gel. *i*) Schematic of a two-face Petri dish. *ii*) Shadowgraph of the swelling front emerging from three colonies, located on the other side of the gel. *iii*) Height profile obtained from optical profilometry. *iv*) Sessile droplet experiment confirms a significant difference in wetting property on either side of the swelling front. Error bars are standard deviation.

287 found to propagate faster on top of obstacles (Figure 2A), where the gel section was smaller, and  
288 slower on top of thicker sections of the gel, which is compatible with a transport of rhamnolipids  
289 through the whole gel. This effect was also found in gels of various thicknesses. Once again,  
290 thinner gels induced faster traveling speed of the swelling front (Figure 2B), in agreement with  
291 transport through the gel. Intriguingly, while thinner gels induce faster spreading of the swelling  
292 front, they also induce smaller swarming colonies (Figure S6). Finally, I tested the swelling speed  
293 in a gel with gradual change of thickness. Pouring liquid agar on a tilted dish resulted in a  
294 gel with a spatial gradient of thickness: on this substrate, the swelling front advanced faster on  
295 the thinning side, slower on the thickening side, and at intermediate speed on the transverse  
296 directions (Figure 2B). Colony did not swarm at all on plates lower than 7 mL. They gradually  
297 were larger and larger on thicker gels and the colony size was maximal on plates of the nominal  
298 volume (20 mL).

299 To further demonstrate transport of rhamnolipids through gels, I designed a "two-face" Petri  
300 dish. I inoculated bacteria on the lower side of the dish and a swelling front was observed on the  
301 upper side. The upper surface was characterized with shadowgraphy, profilometry, and sessile  
302 droplets (Figure 2D). These measurements confirmed that a rhamnolipid-induced swelling front  
303 propagated to the upper surface, even though rhamnolipids were secreted from the lower surface.

### 304 *Rhamnolipids enable surface motility at the single-cell level*

305 Rhamnolipids, transported within the gel, are required for the colony to spread at the surface of  
306 the gel. To better understand the interplay between bulk transport of rhamnolipids and surface  
307 motility, I used  $\Delta rhlA$  mutant, which does not secrete rhamnolipids but is motile, as a sensor  
308 of ability to move on the gel as a function of presence of rhamnolipids. A wild-type colony  
309 was grown on agar gel and a small amount of planktonic  $\Delta rhlA$  cells were seeded on the naked  
310 gel. Individual cells were found to be initially mostly non-motile. Motility was detected only in  
311 denser areas. The passage of the swelling front dramatically perturbed spatial organization of  
312 the cells (Figure 3A and Movie S3), and hampered direct comparison before/after. In particular,  
313 following individual cells was impossible. Instead, motility was assessed by coarse-grained im-

314 age analysis (see Methods). The motility-density dependence was quantified and plotted against  
315 time (Figure 3B-C). Even though cells gradually became more motile with time, incoming rham-  
316 nolipids substantially increased cell motility, at all densities (Movie S4). Therefore, rhamnolipids  
317 are used by bacteria to alter their physical environment over large distances and enable surface  
318 motility.

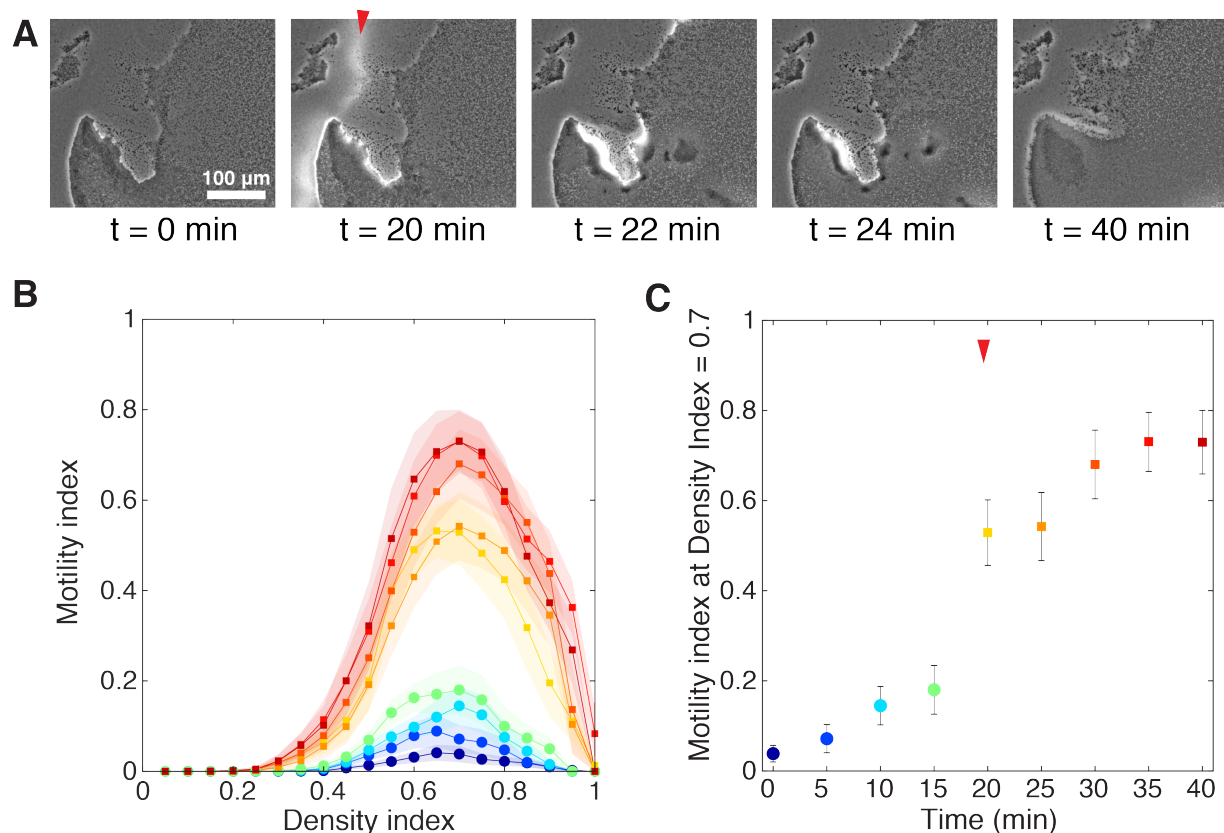

Figure 3: A: Snapshots of micrographs showing  $\Delta rhlA$  cells before and after the swelling front passed through. A red arrowhead depicts the swelling front, visible as a white halo in phase contrast imaging, and moving from the left to the right of the field of view. B: Motility-density analysis reveals rhamnolipids greatly facilitate single-cell motility. Color code is defined in panel C (one curve every 5 minutes). Shading represents standard deviations. C: The effect of rhamnolipids on motility is abrupt, and corresponds to the passage of the swelling front (depicted by the red arrowhead). Error bars represent standard deviations.

319 *Swarming rescue experiments confirm rhamnolipids diffuse across the biogel*

320 This microscopic-scale rescue of motility  $\Delta rhlA$  mutants inspired me to test if such distant rescue  
321 could occur at a macroscopic scale. A plate was inoculated with wild-type cells on one side, and  
322 with  $\Delta rhlA$  cells on the other side. As already showed in Figure 1, the wild-type colony secretes  
323 rhamnolipids (inducing a swelling front) and swarms into a branched shape. The  $\Delta rhlA$  colony  
324 does not secrete rhamnolipids and does not swarm. However, wild-type colony spreading closely  
325 follows the swelling front. To minimize the risk of the secreting colony coming into contact with  
326 the  $\Delta rhlA$  colony, I turned into the  $\Delta rhlA:P_{BAD}rhlAB$  mutant, whose rhamnolipid promoter ex-  
327 pression is induced by a chemical cue, L-arabinose. The  $\Delta rhlA:P_{BAD}rhlAB$  colony dedicates a large  
328 part of its metabolism to rhamnolipid secretion rather than cell proliferation (de Vargas Roditi  
329 *et al.*, 2013), which yields to a swelling front traveling substantially faster than the spreading of  
330 the colony (Figure S7). As shown on Figure 4A (and Movie S5),  $\Delta rhlA$  colonies started swarming  
331 a few hours after the swelling front reached it. Interestingly, the  $\Delta rhlA$  colonies did not spread  
332 radially, but formed tendrils, whose size is comparable to wild-type colony branches. These  
333 tendrils swarmed outward, following the direction of rhamnolipids propagation. These observa-  
334 tions suggest the process of branching is the same whether the colony secretes its own supply of  
335 rhamnolipids or has an outside source.

336 I reproduced the rescue experiment on a two-face Petri dish, with the over-producing colony  
337 ( $\Delta rhlA:P_{BAD}rhlAB$ ) on one side and  $\Delta rhlA$  on the other side (Figure 4B, Movie S5). Here again,  
338 the  $\Delta rhlA$  colonies did not spread radially, but formed a tendril spreading in the direction of  
339 rhamnolipid propagation. This results confirms rhamnolipids imbibe the whole gel, physically  
340 alter it over large distance, and enable a branching process similarly on both side of the two-face  
341 Petri dish.

342 *Physical alteration of the gel by rhamnolipids correlates with colony shape*

343 Since *P. aeruginosa* is capable to alter physical properties of its environment over long distances,  
344 I wanted to verify whether this would hold true for a range of environments. I used agar gels of

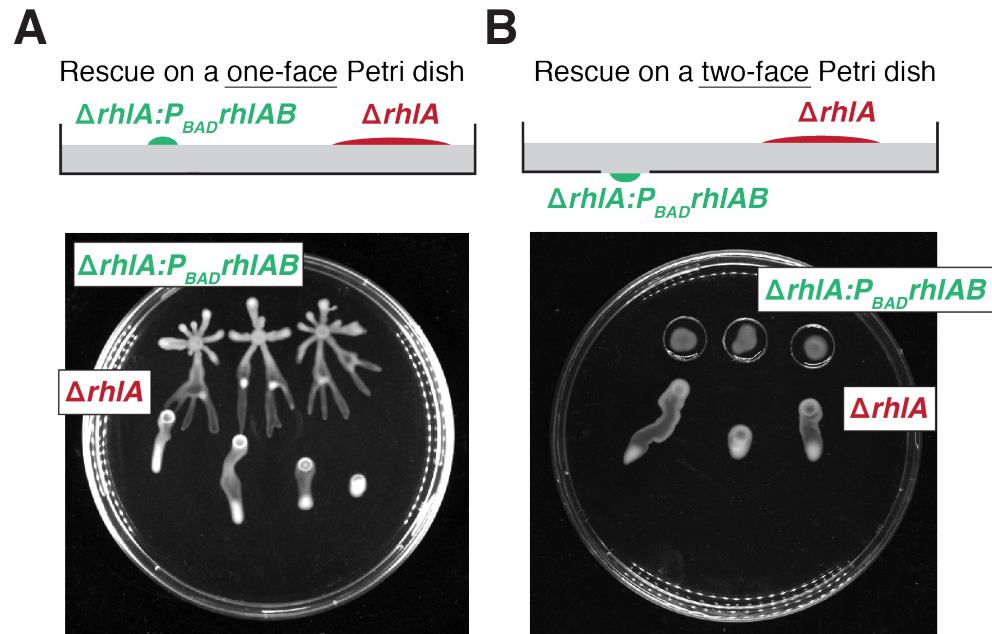

Figure 4: Swarming rescue experiments. A: On one-face Petri dish,  $\Delta rhIA:P_{BAD} rhIAB$  and  $\Delta rhIA$  colonies are grown on the same side. B: On two-face Petri dish,  $\Delta rhIA:P_{BAD} rhIAB$  are grown on one side (within the small hole) and  $\Delta rhIA$  are grown on the opposite side. Control experiment results (with  $\Delta rhIA$  instead of  $\Delta rhIA:P_{BAD} rhIAB$ ) are provided in Supplementary Figure S8. Snapshots are taken 18 hours after inoculation. Timelapse videos of the rescue experiments are available in Movie S5.



345 various agar concentrations (0.4%, 0.5%, 0.6%, and 0.7%) to simulate environments of different  
346 physical properties. Agar gel elastic modulus and pore size were previously characterized and  
347 they were found to be highly dependent on agar concentration. From the literature, pore size  
348 varies from 400 nm at 0.4% to 100 nm at 0.7% (Narayanan *et al.*, 2006; Cuccia *et al.*, 2020); elastic  
349 modulus varies from 4 kPa at 0.4% to 18 kPa at 0.7% (Guenet & Rochas, 2006; Mao *et al.*, 2016).  
350 (Most studies focused on agarose, a polysaccharide isolated from agar, but with comparable  
351 mechanical properties; rheological measurements are difficult to perform on these soft gels, and  
352 those figures must be taken with a grain of salt.)

353 I grew *P. aeruginosa* on plates at the four agar concentrations and confirmed a result already  
354 reported (Tremblay & Déziel, 2008; Kamatkar & ShROUT, 2011; Mattingly *et al.*, 2018): swarming  
355 colony morphogenesis is highly dependent on the gel properties (Figure 5A). At low concentra-  
356 tion (0.4%), the colony was smaller and more circular than the branch colony formed at 0.5%.  
357 At 0.6%, the colony was still branched but smaller than 0.5% colony. The 0.7% colony did not  
358 spread at all. Following the same trend, macroscopic swarming rescue on two-face Petri dished  
359 occurred similarly at 0.4% and 0.5%, little spreading was visible at 0.6%, and no spreading at all  
360 at 0.7% (Figure 5B). In parallel, I characterized the gel and its alteration by secreted rhamnolipids,  
361 for the four agar concentrations.

362 First, I reproduced the sessile droplet experiment as in Figure 1D. Footprint diameters in-  
363 creased with gel concentration when droplets were deposited on the raw gel surface (outside the  
364 rhamnolipid imbibed area), from  $1.77 \pm 0.13$  mm for 0.4% to  $2.41 \pm 0.10$  mm for 0.7% (Figure  
365 5C). In contrast, when droplets were deposited inside the rhamnolipids-imbibed area, footprint  
366 diameters were overall much greater and independent of agar concentrations. They were about  
367  $3.86 (\pm 0.27)$  mm for all conditions, as if rhamnolipids equalized the wetting properties of the  
368 imbibed gels.

369 Second, I measured the swelling front height profiles generated by rhamnolipid imbibition  
370 (Figure 5D). I observed a strong influence of agar concentration: the swelling front jump (mea-  
371 sured 1 mm away from the front, see details in Methods) was  $27.4 \pm 4.2$   $\mu$ m for 0.4% and gradually  
372 decreased for larger agar concentrations ( $3.9 \pm 1.8$   $\mu$ m for 0.7%). This trend was confirmed by

373 shadowgraphy: the front on a 0.4% gel yielded to a strongly contrasted black line, whereas the  
374 front on a 0.7% gel was nearly not visible (data not shown).

375 Third, I located the position of the swelling front as a function of time, on two-face Petri  
376 dishes. A  $\Delta rhIA:P_{BAD}rhIAB$  colony was seeded on the small aperture on the opposite side, in  
377 order to limit the spatial expansion of the rhamnolipid source and to allow for comparison of  
378 swelling front advancing speeds across agar concentrations without having to control for the  
379 source colony size. The position of the swelling front followed a power law  $r = t^\alpha$  with  $\alpha$  ranging  
380 between 0.4 and 0.6 (Figure 5D, inset), in agreement with the Lucas-Washburn equation for  
381 imbibition processes (de Azevedo *et al.*, 2008; Cai *et al.*, 2021). However, a reproducible estimation  
382 of the exponent was difficult, considering the day-to-day variability of agar gel preparation pre-  
383 viously described (Tremblay & Déziel, 2008; Ha *et al.*, 2014; Pearson, 2019). I turned to a simpler  
384 and more robust quantification: the position of the front 15 hours after inoculation. Using this  
385 measure, I found that the swelling front advanced significantly faster in low concentration agar  
386 gels compared to high concentration agar gels (Figure 5E). These results shed a new light to the  
387 well-established fact that swarming motility is strongly dependent on gel hardness (Tremblay &  
388 Déziel, 2008; Kamatkar & Shrout, 2011), and demonstrate that swarming colony morphogenesis  
389 correlates with the long distance physical alteration of the gel, across a range of agar concentra-  
390 tions, via secretion of rhamnolipids.



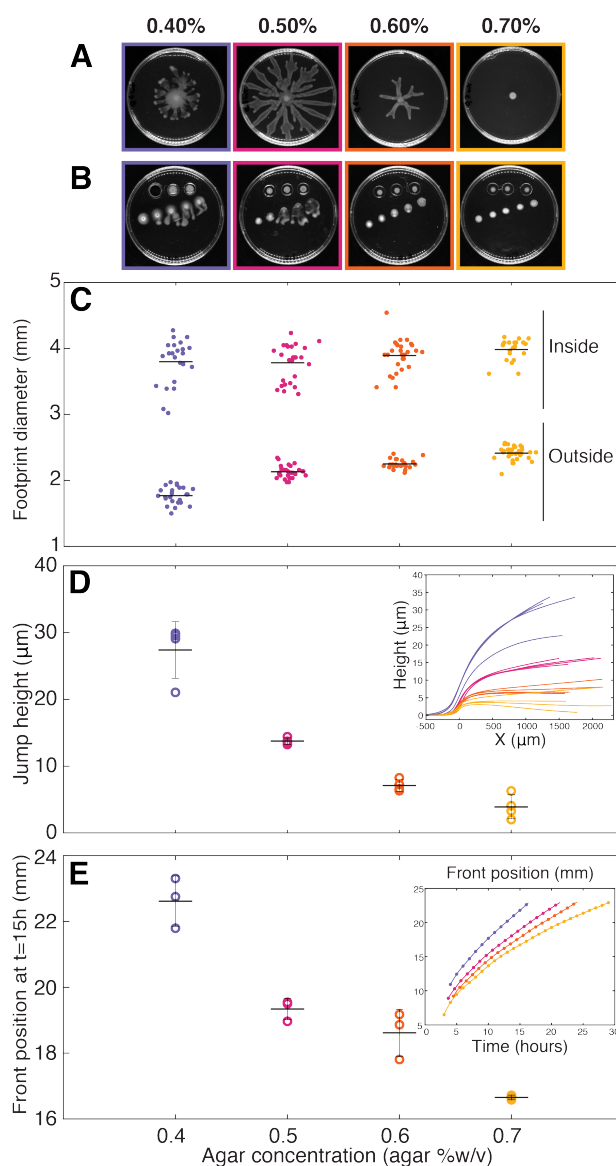

Figure 5: Physical alteration of the gel occurs across a range of agar concentration. A: Snapshots of *P. aeruginosa* swarming colonies, 22 hours after inoculation. Each snapshot is surrounded by a square whose color consistently represents the agar concentration across panels. B: Snapshots of macroscopic rescue experiments, 22 hours after inoculation. (Note one agar patch fell from the two-face Petri dish on the 0.4% plate, just before image acquisition.) C: Footprint diameters for sessile droplet experiments. Droplets were deposited within the rhamnolipid-imbibed area (denoted "Inside") or outside the swelling front (denoted "Outside"). Data points positions were randomized on the horizontal axis for better visualization. Data points originates from 2 biological replicates. D: Jump height measured 1 mm from the swelling front. Inset: Height profiles obtained by optical interferometry. E: Position of the swelling front 15 hours after inoculation. Data points originates from 3 technical replicates. Inset: Time evolution of the front position, from one replicate. For all panels, horizontal bars are dataset averages and vertical bars are standard deviations.

391

## Discussion

392 Self-produced surfactants play an critical role in a many bacterial genera. For example, the  
393 swarming of *Rhizobium etli* (Daniels *et al.*, 2006), *Serratia marcescens* (Ang *et al.*, 2001), *Bacillus*  
394 *subtilis* (Angelini *et al.*, 2009), and *P. aeruginosa* (Caiazza *et al.*, 2005) were shown to be linked to  
395 the presence of biosurfactants. Here, I documented that rhamnolipids, secreted by *P. aerugi-*  
396 *nosa*, physically modify the agar gel by inducing a gel swelling. The swelling front displays a  
397 maximum angle of  $3^\circ$  that is sufficient to make the edge visible to the naked eye and by shad-  
398 owgraphy. Previous work had already noted a change of the surface visual aspect. Those studies  
399 used terms like "zone of fluid", "zone of liquid" (Caiazza *et al.*, 2005), or "ring of biosurfactants"  
400 (Xavier *et al.*, 2011) to describe this modified surface state, but my findings show those views  
401 were incomplete. Further investigation will be necessary to understand the swelling mechanism,  
402 which might involve complex interplay between gel pores, osmolarity, hydrophobic interactions,  
403 etc., and might control the spatial distribution of rhamnolipid congeners (Tremblay *et al.*, 2007),  
404 and goes beyond the scope of this study. Yet, since bacterial colony spreading is controlled by  
405 osmotic influx of water from the hydrogel into the colony. Rhamnolipids could possibly be play-  
406 ing a role in this process by causing local swelling in the gel. Investigating this further could be  
407 a promising area of research.

408 Additionally, I demonstrated that transport of rhamnolipids is not restricted to the surface of  
409 the agar gel. On the contrary, rhamnolipids imbibe the whole thickness of the gel. A direct con-  
410 sequence of the transport in volume is that spreading speed depends on the local section of the  
411 gel, with faster spreading on thinner gels. The modulation of the swelling front traveling speed  
412 is likely to be conflated with resource availability: a thinner gel contains less nutrient, yields to  
413 a smaller colony, and is expected to produce to a slower swelling front. Experimental data goes  
414 in the opposite direction: thinner gels yields to faster, not slower, swelling front. Interestingly,  
415 colonies do not spread faster on thinner gel. This highlights the complex interplay between re-  
416 sources availability, rhamnolipids spatial distribution, and swarming motility (Xavier *et al.*, 2011;  
417 Boyle *et al.*, 2015), and the importance of spatial structure in stabilization of cooperative behaviors

418 (Monaco *et al.*, 2022; Deforet *et al.*, 2019).

419 The swelling front advancing speed, typically 1 mm/h, is substantially lower than the spread-  
420 ing dynamics of surfactants on liquid films (typically 1 mm/s (Matar & Troian, 1999)). It resem-  
421 bles precursor front in fluid imbibition dynamics of porous materials, which can be interpreted  
422 as non-Fickian transport in a Darcy flow (de Azevedo *et al.*, 2008; Cai *et al.*, 2021). Moreover, the  
423 deformation of the agar gel is likely to be coupled to the effective diffusivity of rhamnolipids  
424 through the gel. Since rhamnolipids are capable to reach the opposite surface, one could assume,  
425 in first approximation, a uniform concentration profile across the gel thickness. Yet, agar gel  
426 is a physically-crosslinked hydrogel, and the physico-chemistry of its interaction with surfac-  
427 tants could lead to a non-uniform profile of concentration (Banaha *et al.*, 2009; Boral *et al.*, 2010).  
428 Colony branching in two-face rescue experiments confirms that bulk gel imbibition generates  
429 a lateral gradient of surfactant concentration that could potentially interact with the spreading  
430 colony itself.

431 Alteration of the biotic or abiotic environment by living organisms have the potential to  
432 modulate motility and dispersal mechanics. Secreted metabolites can act as chemoattractants  
433 (Roussos *et al.*, 2011; Colin & Sourjik, 2017), trigger quorum sensing (Waters *et al.*, 2005), partici-  
434 pate in self-organization in stigmergic behavior (Theraulaz & Bonabeau, 1999; D'alessandro *et al.*,  
435 2021), and control single-cell motility (Wershof *et al.*, 2019). These mechanisms rely on release of  
436 diffusible molecules, or local deposition of non-diffusible signals. Here, I evidenced a mechanism  
437 where bacteria alter their physical world on a lengthscale substantially larger than their own size.  
438 I confirmed this effect holds true across a range of agar concentration. It would be interesting  
439 to test other biogel materials (Morin & Déziel, 2021), especially those with biomedical implica-  
440 tions, such as mucus (Yeung *et al.*, 2012; Rossy *et al.*, 2022). Moreover, rhamnolipids are shown  
441 to be involved in many killing processes (towards other bacteria (Bharali *et al.*, 2013), fungus  
442 (Soltani Dashtbozorg *et al.*, 2016), immune cells (Jensen *et al.*, 2007), or higher organisms (Za-  
443 borin *et al.*, 2009; Silva *et al.*, 2015)): understanding how this killing agent is transported through  
444 complex media is of critical importance.

445 This complex interplay between surfactants secretion, biogel properties alteration and bacte-

446 rial motility is a unique example of the capacity of bacteria to change the mechanical properties  
447 of the world around them, and ultimately, to interact with their distant peers (Estrela *et al.*, 2019).

448

## Acknowledgments

449 I thank members of the Laboratoire Jean Perrin for fruitful discussions. I am grateful to Françoise  
450 Brochard-Wyart for pointing me to the reference (de Azevedo *et al.*, 2008), and to Eric Deziel  
451 for providing the *rhlB*<sup>-</sup> and *rhlC*<sup>-</sup> strains used in this study. This project has received financial  
452 support from the CNRS through the MITI interdisciplinary program, from the Alliance Sorbonne  
453 Université through the Emergence program, and from the ANR (ANR-21-CE30-0025).

## References

454

455 Abdel-Mawgoud, A. M.; Aboulwafa, M. M. & Hassouna, N. A.-H. 2009: Characterization of  
456 rhamnolipid produced by *pseudomonas aeruginosa* isolate bs20. *Applied biochemistry and*  
457 *biotechnology* 157(2):329–345.

458 Abdel-Mawgoud, A. M.; Lépine, F. & Déziel, E. 2010: Rhamnolipids: diversity of structures,  
459 microbial origins and roles. *Applied microbiology and biotechnology* 86:1323–1336.

460 Ang, S.; Horng, Y.-T.; Shu, J.-C.; Soo, P.-C.; Liu, J.-H.; Yi, W.-C.; Lai, H.-C.; Luh, K.-T.; Ho, S.-W. &  
461 Swift, S. 2001: The role of *rsma* in the regulation of swarming motility in *serratia marcescens*.  
462 *Journal of biomedical science* 8(2):160–169.

463 Angelini, T. E.; Roper, M.; Kolter, R.; Weitz, D. A. & Brenner, M. P. 2009: *Bacillus subtilis*  
464 spreads by surfing on waves of surfactant. *Proceedings of the National Academy of Sciences*  
465 106(43):18109–18113.

466 de Azevedo, E. N.; Alme, L. R.; Engelsberg, M.; Fossum, J. O. & Dommersnes, P. 2008: Fluid  
467 imbibition in paper fibers: Precursor front. *Physical Review E* 78(6):066317.

468 Badal, D.; Jayarani, A. V.; Kollaran, M. A.; Prakash, D.; P, M.; Singh, V. & Goldberg, J. B. 2021:  
469 Foraging signals promote swarming in starving *pseudomonas aeruginosa*. *mBio* 0(0):e02033–  
470 21.

471 Banaha, M.; Daerr, A. & Limat, L. 2009: Spreading of liquid drops on agar gels. *The European*  
472 *Physical Journal Special Topics* 166(1):185–188.

473 Baym, M.; Lieberman, T. D.; Kelsic, E. D.; Chait, R.; Gross, R.; Yelin, I. & Kishony, R. 2016:  
474 Spatiotemporal microbial evolution on antibiotic landscapes. *Science* 353(6304):1147–1151.

475 Berk, V.; Fong, J. C.; Dempsey, G. T.; Develioglu, O. N.; Zhuang, X.; Liphardt, J.; Yildiz, F. H.  
476 & Chu, S. 2012: Molecular architecture and assembly principles of *vibrio cholerae* biofilms.  
477 *Science* 337(6091):236–239.

- 478 Bharali, P.; Saikia, J.; Ray, A. & Konwar, B. 2013: Rhamnolipid (rl) from *Pseudomonas aerugi-*  
479 *nosa* obp1: a novel chemotaxis and antibacterial agent. *Colloids and Surfaces B: Biointerfaces*  
480 103:502–509.
- 481 Bibi, A.; Rehman, S.-u.; Faiz, R.; Akhtar, T.; Nawaz, M. & Bibi, S. 2019: Effect of surfactants on  
482 swelling capacity and kinetics of alginate-chitosan/cnts hydrogel. *Materials Research Express*  
483 6(8):085065.
- 484 Boral, S.; Saxena, A. & Bohidar, H. 2010: Syneresis in agar hydrogels. *International journal of*  
485 *biological macromolecules* 46(2):232–236.
- 486 Boyle, K. E.; Monaco, H.; van Ditmarsch, D.; Deforet, M. & Xavier, J. B. 2015: Integration of  
487 metabolic and quorum sensing signals governing the decision to cooperate in a bacterial social  
488 trait. *PLoS computational biology* 11(6):e1004279.
- 489 Cai, J.; Jin, T.; Kou, J.; Zou, S.; Xiao, J. & Meng, Q. 2021: Lucas–washburn equation-based  
490 modeling of capillary-driven flow in porous systems. *Langmuir* 37(5):1623–1636.
- 491 Caiazza, N. C.; Shanks, R. M. Q. & O’Toole, G. A. 2005: Rhamnolipids modulate swarming  
492 motility patterns of *Pseudomonas aeruginosa*. *Journal of Bacteriology* 187(21):7351–7361.
- 493 Chew, S. C.; Kundukad, B.; Seviour, T.; Van der Maarel, J. R.; Yang, L.; Rice, S. A.; Doyle,  
494 P. & Kjelleberg, S. 2014: Dynamic remodeling of microbial biofilms by functionally distinct  
495 exopolysaccharides. *MBio* 5(4):e01536–14.
- 496 Colin, R.; Ni, B.; Laganenka, L. & Sourjik, V. 2021: Multiple functions of flagellar motility and  
497 chemotaxis in bacterial physiology. *FEMS Microbiology Reviews* 45(6):fuab038.
- 498 Colin, R. & Sourjik, V. 2017: Emergent properties of bacterial chemotaxis pathway. *Current*  
499 *opinion in microbiology* 39:24–33.
- 500 Copeland, M. F. & Weibel, D. B. 2009: Bacterial swarming: a model system for studying dynamic  
501 self-assembly. *Soft matter* 5(6):1174–1187.

- 502 Cuccia, N. L.; Pothineni, S.; Wu, B.; Méndez Harper, J. & Burton, J. C. 2020: Pore-size dependence  
503 and slow relaxation of hydrogel friction on smooth surfaces. *Proceedings of the National*  
504 *Academy of Sciences* 117(21):11247–11256.
- 505 Daniels, R.; Reynaert, S.; Hoekstra, H.; Verreth, C.; Janssens, J.; Braeken, K.; Fauvart, M.; Beullens,  
506 S.; Heusdens, C.; Lambrechts, I. *et al.* 2006: Quorum signal molecules as biosurfactants affecting  
507 swarming in rhizobium etli. *Proceedings of the National Academy of Sciences* 103(40):14965–  
508 14970.
- 509 Daniels, R.; Vanderleyden, J. & Michiels, J. 2004: Quorum sensing and swarming migration in  
510 bacteria. *FEMS microbiology reviews* 28(3):261–289.
- 511 Deforet, M.; Carmona-Fontaine, C.; Korolev, K. S. & Xavier, J. B. 2019: Evolution at the edge of  
512 expanding populations. *The American Naturalist* 194(3):291–305.
- 513 Deforet, M.; Van Ditmarsch, D.; Carmona-Fontaine, C. & Xavier, J. B. 2014: Hyperswarming  
514 adaptations in a bacterium improve collective motility without enhancing single cell motility.  
515 *Soft matter* 10(14):2405–2413.
- 516 Deng, P.; de Vargas Roditi, L.; Van Ditmarsch, D. & Xavier, J. B. 2014: The ecological basis of  
517 morphogenesis: branching patterns in swarming colonies of bacteria. *New journal of physics*  
518 16(1):015006.
- 519 Deziel, E.; Lepine, F.; Milot, S. & Villemur, R. 2003: rhlA is required for the production  
520 of a novel biosurfactant promoting swarming motility in pseudomonas aeruginosa: 3-(3-  
521 hydroxyalkanoyloxy) alkanolic acids (haas), the precursors of rhamnolipids. *Microbiology*  
522 149(8):2005–2013.
- 523 Dilanji, G. E.; Teplitski, M. & Hagen, S. J. 2014: Entropy-driven motility of sinorhizobium  
524 meliloti on a semi-solid surface. *Proceedings of the Royal Society B: Biological Sciences*  
525 281(1784):20132575.
- 526 Du, H.; Xu, Z.; Anyan, M.; Kim, O.; Leevy, W. M.; Shrout, J. D. & Alber, M. 2012: High density

- 527 waves of the bacterium *pseudomonas aeruginosa* in propagating swarms result in efficient  
528 colonization of surfaces. *Biophysical journal* 103(3):601–609.
- 529 Du, H.; Xu, Z.; Shrout, J. D. & Alber, M. 2011: Multiscale modeling of *pseudomonas aeruginosa*  
530 swarming. *Mathematical Models and Methods in Applied Sciences* 21(supp01):939–954.
- 531 D’alessandro, J.; Cellerin, V.; Benichou, O.; Mège, R. M.; Voituriez, R.; Ladoux, B. *et al.* 2021: Cell  
532 migration guided by long-lived spatial memory. *Nature Communications* 12(1):1–10.
- 533 Estrela, S.; Libby, E.; Van Cleve, J.; Débarre, F.; Deforet, M.; Harcombe, W. R.; Peña, J.; Brown,  
534 S. P. & Hochberg, M. E. 2019: Environmentally mediated social dilemmas. *Trends in ecology*  
535 & *evolution* 34(1):6–18.
- 536 Fauvart, M.; Phillips, P.; Bachaspatimayum, D.; Verstraeten, N.; Fransaeer, J.; Michiels, J. & Ver-  
537 mant, J. 2012: Surface tension gradient control of bacterial swarming in colonies of *pseu-*  
538 *domonas aeruginosa*. *Soft Matter* 8(1):70–76.
- 539 Giverso, C.; Verani, M. & Ciarletta, P. 2015: Branching instability in expanding bacterial colonies.  
540 *Journal of The Royal Society Interface* 12(104):20141290.
- 541 Greenfield, D.; McEvoy, A. L.; Shroff, H.; Crooks, G. E.; Wingreen, N. S.; Betzig, E. & Liphardt,  
542 J. 2009: Self-organization of the *escherichia coli* chemotaxis network imaged with super-  
543 resolution light microscopy. *PLoS biology* 7(6):e1000137.
- 544 Gudiña, E. J.; Rodrigues, A. I.; Alves, E.; Domingues, M. R.; Teixeira, J. A. & Rodrigues, L. R. 2015:  
545 Bioconversion of agro-industrial by-products in rhamnolipids toward applications in enhanced  
546 oil recovery and bioremediation. *Bioresource technology* 177:87–93.
- 547 Guenet, J.-M. & Rochas, C. 2006: Agarose sols and gels revisited. *Macromolecular symposia*,  
548 volume 242, pages 65–70. Wiley Online Library.
- 549 Ha, D.-G.; Kuchma, S. L. & O’Toole, G. A. 2014: Plate-based assay for swarming motility in  
550 *pseudomonas aeruginosa*. *Pseudomonas methods and protocols*, pages 67–72. Springer.



- 551 Hölscher, T. & Kovács, Á. T. 2017: Sliding on the surface: bacterial spreading without an active  
552 motor. *Environmental Microbiology* 19(7):2537–2545.
- 553 Jeckel, H.; Jelli, E.; Hartmann, R.; Singh, P. K.; Mok, R.; Totz, J. F.; Vidakovic, L.; Eckhardt, B.;  
554 Dunkel, J. & Drescher, K. 2019: Learning the space-time phase diagram of bacterial swarm  
555 expansion. *Proceedings of the National Academy of Sciences* 116(5):1489–1494.
- 556 Jensen, P. Ø.; Bjarnsholt, T.; Phipps, R.; Rasmussen, T. B.; Calum, H.; Christoffersen, L.; Moser,  
557 C.; Williams, P.; Pressler, T.; Givskov, M. *et al.* 2007: Rapid necrotic killing of polymorphonu-  
558 clear leukocytes is caused by quorum-sensing-controlled production of rhamnolipid by pseu-  
559 domonas aeruginosa. *Microbiology* 153(5):1329–1338.
- 560 Kamatkar, N. G. & Shrout, J. D. 2011: Surface hardness impairment of quorum sensing and  
561 swarming for pseudomonas aeruginosa. *PloS one* 6(6):e20888.
- 562 Kearns, D. B. 2010: A field guide to bacterial swarming motility. *Nature Reviews Microbiology*  
563 8(9):634–644.
- 564 Li, S.; Zhang, M. & Vogt, B. D. 2021: Delayed swelling and dissolution of hydrophobically as-  
565 sociated hydrogel coatings by dilute aqueous surfactants. *ACS Applied Polymer Materials*  
566 4(1):250–259.
- 567 Liberati, N. T.; Urbach, J. M.; Miyata, S.; Lee, D. G.; Drenkard, E.; Wu, G.; Villanueva, J.; Wei,  
568 T. & Ausubel, F. M. 2006: An ordered, nonredundant library of pseudomonas aeruginosa  
569 strain pa14 transposon insertion mutants. *Proceedings of the National Academy of Sciences*  
570 103(8):2833–2838.
- 571 Luo, N.; Wang, S.; Lu, J.; Ouyang, X. & You, L. 2021: Collective colony growth is optimized  
572 by branching pattern formation in pseudomonas aeruginosa. *Molecular systems biology*  
573 17(4):e10089.
- 574 Ma, H.; Bell, J.; Chen, W.; Mani, S. & Tang, J. X. 2021: An expanding bacterial colony forms a  
575 depletion zone with growing droplets. *Soft Matter* 17(8):2315–2326.

- 576 Mao, B.; Divoux, T. & Snabre, P. 2016: Normal force controlled rheology applied to agar gelation.  
577 *Journal of Rheology* 60(3):473–489.
- 578 Matar, O. K. & Craster, R. V. 2009: Dynamics of surfactant-assisted spreading. *Soft Matter*  
579 5(20):3801–3809.
- 580 Matar, O. K. & Troian, S. M. 1999: The development of transient fingering patterns during the  
581 spreading of surfactant coated films. *Physics of Fluids* 11(11):3232–3246.
- 582 Mattingly, A. E.; Weaver, A. A.; Dimkovikj, A. & Shrout, J. D. 2018: Assessing travel conditions:  
583 environmental and host influences on bacterial surface motility.
- 584 Mavridou, D. A.; Gonzalez, D.; Kim, W.; West, S. A. & Foster, K. R. 2018: Bacteria use collective  
585 behavior to generate diverse combat strategies. *Current Biology* 28(3):345–355.
- 586 Mirzoeva, O.; Grishanin, R. & Calder, P. 1997: Antimicrobial action of propolis and some of its  
587 components: the effects on growth, membrane potential and motility of bacteria. *Microbiolog-  
588 ical research* 152(3):239–246.
- 589 Monaco, H.; Liu, K. S.; Sereno, T.; Deforet, M.; Taylor, B. P.; Chen, Y.; Reagor, C. C. & Xavier,  
590 J. B. 2022: Spatial-temporal dynamics of a microbial cooperative behavior resistant to cheating.  
591 *Nature communications* 13(1):1–11.
- 592 Morin, C. D. & Déziel, E. 2021: Use of alternative gelling agents reveals the role of rhamnolipids  
593 in *Pseudomonas aeruginosa* surface motility. *Biomolecules* 11(10):1468.
- 594 Morris, J. D.; Hewitt, J. L.; Wolfe, L. G.; Kamatkar, N. G.; Chapman, S. M.; Diener, J. M.; Courtney,  
595 A. J.; Leevy, W. M. & Shrout, J. D. 2011: Imaging and analysis of *Pseudomonas aeruginosa*  
596 swarming and rhamnolipid production. *Applied and environmental microbiology* 77(23):8310–  
597 8317.
- 598 Narayanan, J.; Xiong, J.-Y. & Liu, X.-Y. 2006: Determination of agarose gel pore size: Absorbance  
599 measurements vis a vis other techniques. *Journal of Physics: Conference Series*, volume 28,  
600 page 017. IOP Publishing.

- 601 O'Toole, G. A. & Kolter, R. 1998: Flagellar and twitching motility are necessary for *Pseudomonas*  
602 *aeruginosa* biofilm development. *Molecular microbiology* 30(2):295–304.
- 603 Pamp, S. J. & Tolker-Nielsen, T. 2007: Multiple roles of biosurfactants in structural biofilm devel-  
604 opment by *Pseudomonas aeruginosa*. *Journal of bacteriology* 189(6):2531–2539.
- 605 Pappenfort, K. & Bassler, B. L. 2016: Quorum sensing signal–response systems in gram-negative  
606 bacteria. *Nature Reviews Microbiology* 14(9):576–588.
- 607 Pearson, M. M. 2019: Methods for studying swarming and swimming motility. *Proteus mirabilis*,  
608 pages 15–25. Springer.
- 609 Persat, A.; Nadell, C. D.; Kim, M. K.; Ingremeau, F.; Siryaporn, A.; Drescher, K.; Wingreen,  
610 N. S.; Bassler, B. L.; Gitai, Z. & Stone, H. A. 2015: The mechanical world of bacteria. *Cell*  
611 161(5):988–997.
- 612 Ping, L.; Wu, Y.; Hosu, B. G.; Tang, J. X. & Berg, H. C. 2014: Osmotic pressure in a bacterial  
613 swarm. *Biophysical journal* 107(4):871–878.
- 614 Ratzke, C. & Gore, J. 2018: Modifying and reacting to the environmental pH can drive bacterial  
615 interactions. *PLoS biology* 16(3):e2004248.
- 616 Rhodeland, B.; Hoeger, K. & Ursell, T. 2020: Bacterial surface motility is modulated by colony-  
617 scale flow and granular jamming. *Journal of the Royal Society Interface* 17(167):20200147.
- 618 Rossy, T.; Distler, T.; Pezoldt, J.; Kim, J.; Tala, L.; Bouklas, N.; Deplancke, B. & Persat, A. 2022:  
619 *Pseudomonas aeruginosa* contracts mucus to rapidly form biofilms in tissue-engineered hu-  
620 man airways. *bioRxiv* .
- 621 Roussos, E. T.; Condeelis, J. S. & Patsialou, A. 2011: Chemotaxis in cancer. *Nature Reviews*  
622 *Cancer* 11(8):573–587.
- 623 Rütchlin, S. & Böttcher, T. 2020: Inhibitors of bacterial swarming behavior. *Chemistry–A Euro-*  
624 *pean Journal* 26(5):964–979.

- 625 Santamaria, G.; Liao, C.; Lindberg, C.; Chen, Y.; Wang, Z.; Rhee, K.; Pinto, F. R.; Yan, J. & Xavier,  
626 J. B. 2022: Evolution and regulation of microbial secondary metabolism. *Elife* 11:e76119.
- 627 Schroth, M. N.; Cho, J. J.; Green, S. K.; Kominos, S. D. *et al.* 2018: Epidemiology of *Pseudomonas*  
628 *aeruginosa* in agricultural areas. *Journal of Medical Microbiology* 67(8):1191–1201.
- 629 Seminara, A.; Angelini, T. E.; Wilking, J. N.; Vlamakis, H.; Ebrahim, S.; Kolter, R.; Weitz, D. A. &  
630 Brenner, M. P. 2012: Osmotic spreading of *Bacillus subtilis* biofilms driven by an extracellular  
631 matrix. *Proceedings of the National Academy of Sciences* 109(4):1116–1121.
- 632 Settles, G. S. 2001: Schlieren and shadowgraph techniques: visualizing phenomena in transparent  
633 media. Springer Science & Business Media.
- 634 Silva, V. L.; Lovaglio, R. B.; Von Zuben, C. J. & Contiero, J. 2015: Rhamnolipids: solution against  
635 *Aedes aegypti*? *Frontiers in Microbiology* 6:88.
- 636 Soltani Dashtbozorg, S.; Miao, S. & Ju, L.-K. 2016: Rhamnolipids as environmentally friendly  
637 biopesticide against plant pathogen *Phytophthora sojae*. *Environmental Progress & Sustainable*  
638 *Energy* 35(1):169–173.
- 639 Srinivasan, S.; Kaplan, C. N. & Mahadevan, L. 2019: A multiphase theory for spreading microbial  
640 swarms and films. *Elife* 8:e42697.
- 641 Teo, W.; Caprariello, A. V.; Morgan, M. L.; Luchicchi, A.; Schenk, G. J.; Joseph, J. T.; Geurts,  
642 J. J. G. & Stys, P. K. 2021: Nile red fluorescence spectroscopy reports early physicochemical  
643 changes in myelin with high sensitivity. *Proceedings of the National Academy of Sciences*  
644 118(8):e2016897118.
- 645 Thakur, P.; Saini, N. K.; Thakur, V. K.; Gupta, V. K.; Saini, R. V. & Saini, A. K. 2021: Rham-  
646 nolipid the glycolipid biosurfactant: Emerging trends and promising strategies in the field of  
647 biotechnology and biomedicine. *Microbial Cell Factories* 20(1):1–15.
- 648 Theraulaz, G. & Bonabeau, E. 1999: A brief history of stigmergy. *Artificial life* 5(2):97–116.

- 649 Tremblay, J. & Déziel, E. 2008: Improving the reproducibility of pseudomonas aeruginosa swarm-  
650 ing motility assays. *Journal of basic microbiology* 48(6):509–515.
- 651 Tremblay, J.; Richardson, A.-P.; Lépine, F. & Déziel, E. 2007: Self-produced extracellular stimuli  
652 modulate the pseudomonas aeruginosa swarming motility behaviour. *Environmental Micro-*  
653 *biology* 9(10):2622–2630.
- 654 Trinschek, S.; John, K. & Thiele, U. 2018: Modelling of surfactant-driven front instabilities in  
655 spreading bacterial colonies. *Soft Matter* 14(22):4464–4476.
- 656 Tropini, C. 2021: How the physical environment shapes the microbiota. *Msystems* 6(4):e00675–21.
- 657 de Vargas Roditi, L.; Boyle, K. E. & Xavier, J. B. 2013: Multilevel selection analysis of a microbial  
658 social trait. *Molecular systems biology* 9(1):684.
- 659 Varvaresou, A. & Iakovou, K. 2015: Biosurfactants in cosmetics and biopharmaceuticals. *Letters*  
660 *in applied microbiology* 61(3):214–223.
- 661 Wadhwa, N. & Berg, H. C. 2021: Bacterial motility: machinery and mechanisms. *Nature Reviews*  
662 *Microbiology* pages 1–13.
- 663 Waters, C. M.; Bassler, B. L. *et al.* 2005: Quorum sensing: cell-to-cell communication in bacteria.  
664 *Annual review of cell and developmental biology* 21(1):319–346.
- 665 Wershof, E.; Park, D.; Jenkins, R. P.; Barry, D. J.; Sahai, E. & Bates, P. A. 2019: Matrix feedback en-  
666 ables diverse higher-order patterning of the extracellular matrix. *PLoS computational biology*  
667 15(10):e1007251.
- 668 Xavier, J. B.; Kim, W. & Foster, K. R. 2011: A molecular mechanism that stabilizes cooperative  
669 secretions in pseudomonas aeruginosa. *Molecular microbiology* 79(1):166–179.
- 670 Yan, J.; Nadell, C. D.; Stone, H. A.; Wingreen, N. S. & Bassler, B. L. 2017: Extracellular-matrix-  
671 mediated osmotic pressure drives vibrio cholerae biofilm expansion and cheater exclusion.  
672 *Nature communications* 8(1):1–11.

- 673 Yang, A.; Tang, W. S.; Si, T. & Tang, J. X. 2017: Influence of physical effects on the swarming  
674 motility of *pseudomonas aeruginosa*. *Biophysical Journal* 112(7):1462–1471.
- 675 Yang, J. Q.; Sanfilippo, J. E.; Abbasi, N.; Gitai, Z.; Bassler, B. L. & Stone, H. A. 2021: Evidence for  
676 biosurfactant-induced flow in corners and bacterial spreading in unsaturated porous media.  
677 *Proceedings of the National Academy of Sciences* 118(38):e2111060118.
- 678 Yeung, A. T.; Parayno, A. & Hancock, R. E. 2012: Mucin promotes rapid surface motility in  
679 *pseudomonas aeruginosa*. *MBio* 3(3):e00073–12.
- 680 Yeung, A. T.; Torfs, E. C.; Jamshidi, F.; Bains, M.; Wiegand, I.; Hancock, R. E. & Overhage, J. 2009:  
681 Swarming of *pseudomonas aeruginosa* is controlled by a broad spectrum of transcriptional  
682 regulators, including *metr*. *Journal of bacteriology* 191(18):5592–5602.
- 683 Zaborin, A.; Romanowski, K.; Gerdes, S.; Holbrook, C.; Lepine, F.; Long, J.; Poroyko, V.; Diggle,  
684 S. P.; Wilke, A.; Righetti, K.; Morozova, I.; Babrowski, T.; Liu, D. C.; Zaborina, O. & Alverdy,  
685 J. C. 2009: Red death in *Caenorhabditis elegans* caused by *pseudomonas aeruginosa* *pao1*. *Proceedings of the National Academy of Sciences* 106(15):6327–6332.  
686

1

## Supplementary figures

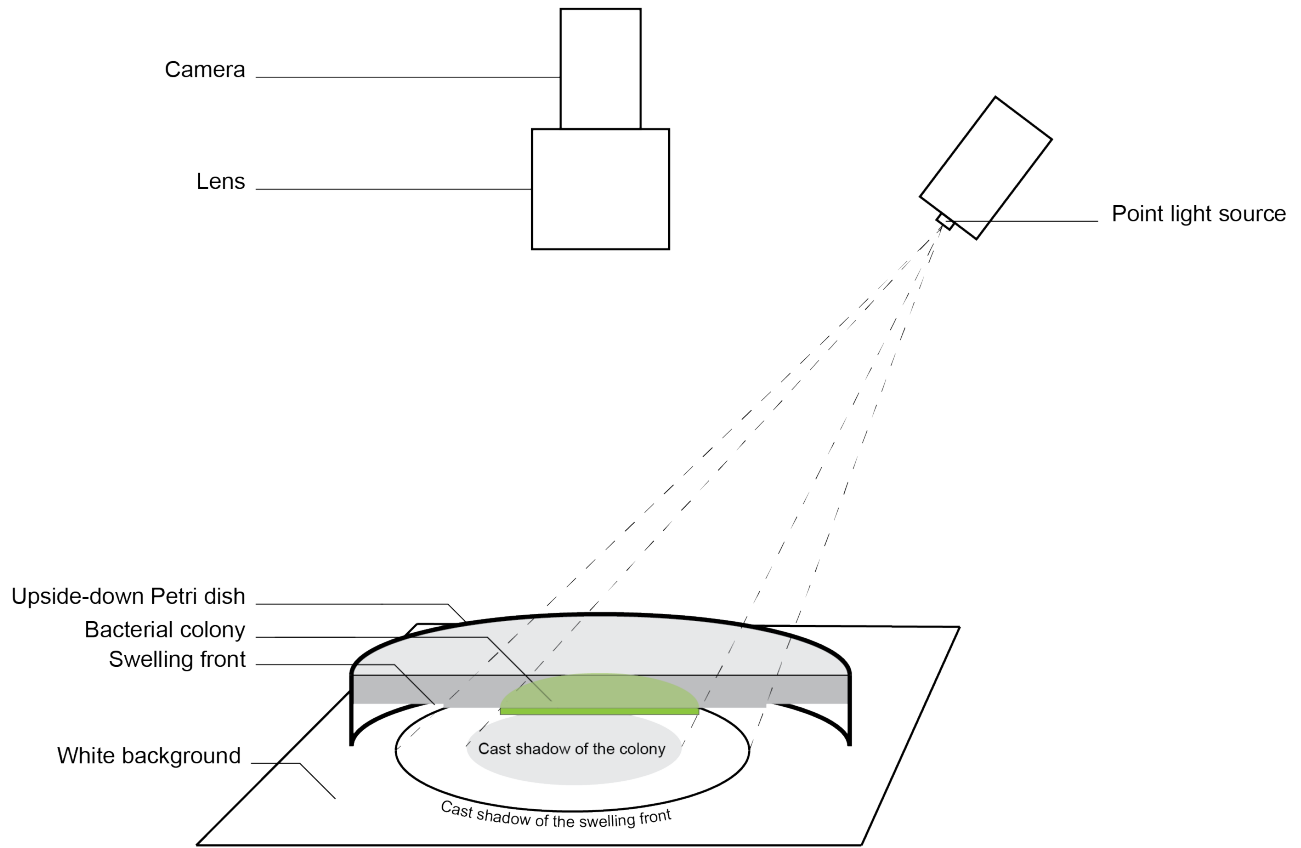

Figure S1: Schematic of the shadowgraphy principle: the light coming from a point source illuminates the colony, but its shadow is cast onto a white background. The camera is focalized on the white background to record the shadow, not on the surface of the gel. For clarity, only half of the Petri dish is displayed.



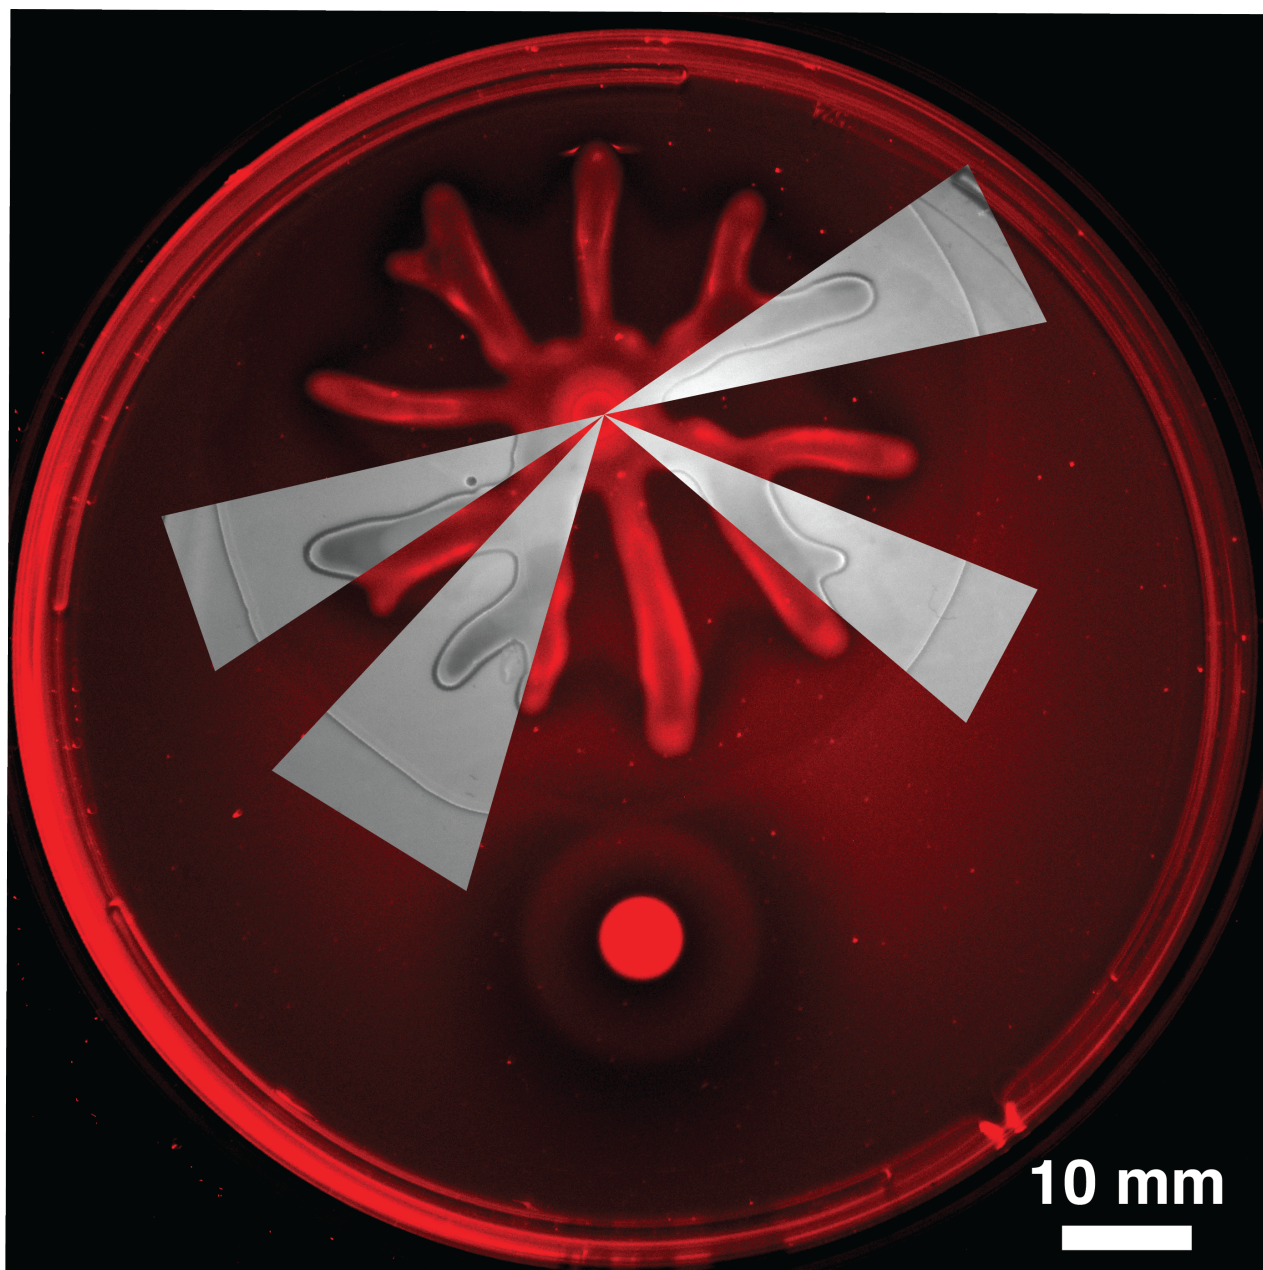

Figure S2: Combined snapshots from shadowgraphy and Nile Red fluorescence imaging. The swelling front revealed from shadowgraphy coincides with a drop of fluorescence that corresponds to a change of solvent polarity.



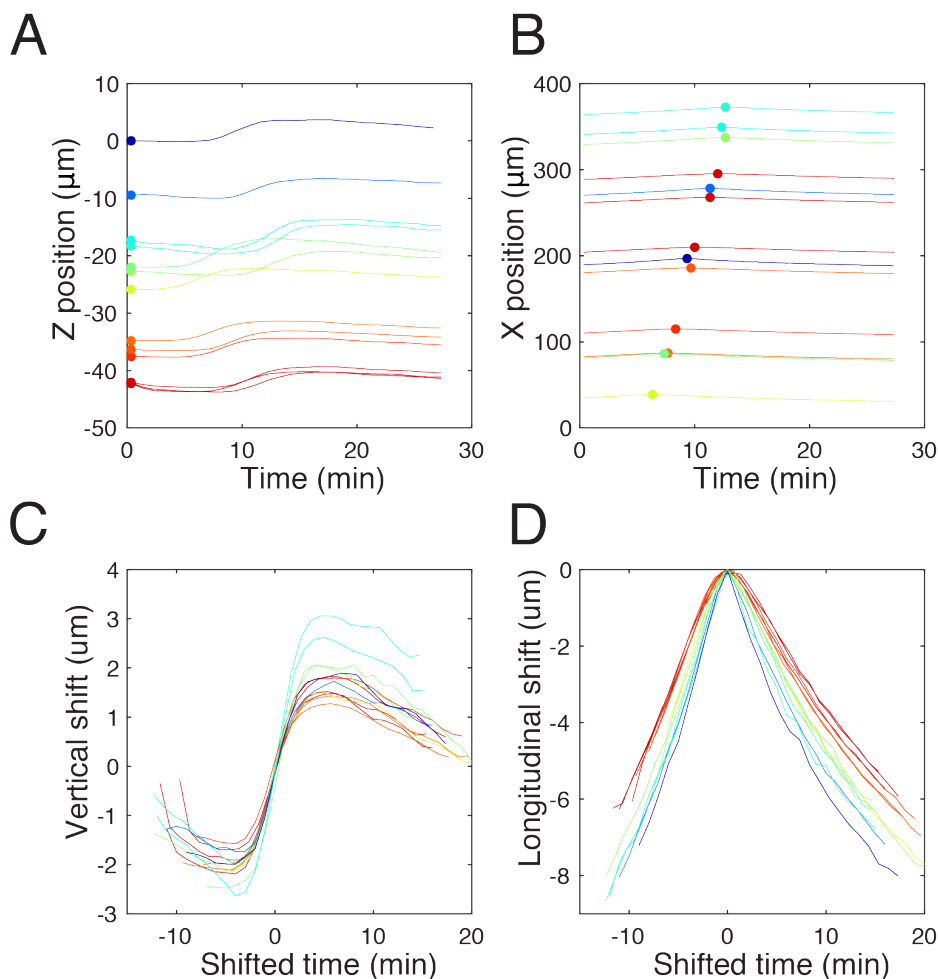

Figure S3: The swelling front is characterized by vertical shift and longitudinal dilation. A: Absolute position  $Z(t)$  for all beads ( $N=13$ ) detected and tracked during this acquisition. Color in all panels codes for initial depth in the gel. B: Absolute position  $X(t)$  for all beads. The maximal  $X$  position for each bead is depicted with a dot. The  $(X_{max}, t_{max})$  coordinates of these dots reveals the propagation speed of the swelling front. C: Relative vertical positions  $(Z(t) - Z(t_{max}))$  for all beads, as a function of relative time  $(t - t_{max})$ . The swelling amplitude is independent on the initial depth. D: Relative longitudinal positions  $(X(t) - X_{max})$ , as a function of relative time  $(t - t_{max})$ . Deeper beads move slower in the longitudinal direction. For the sake of clarity, Figure 1F only represents a subset of the data.

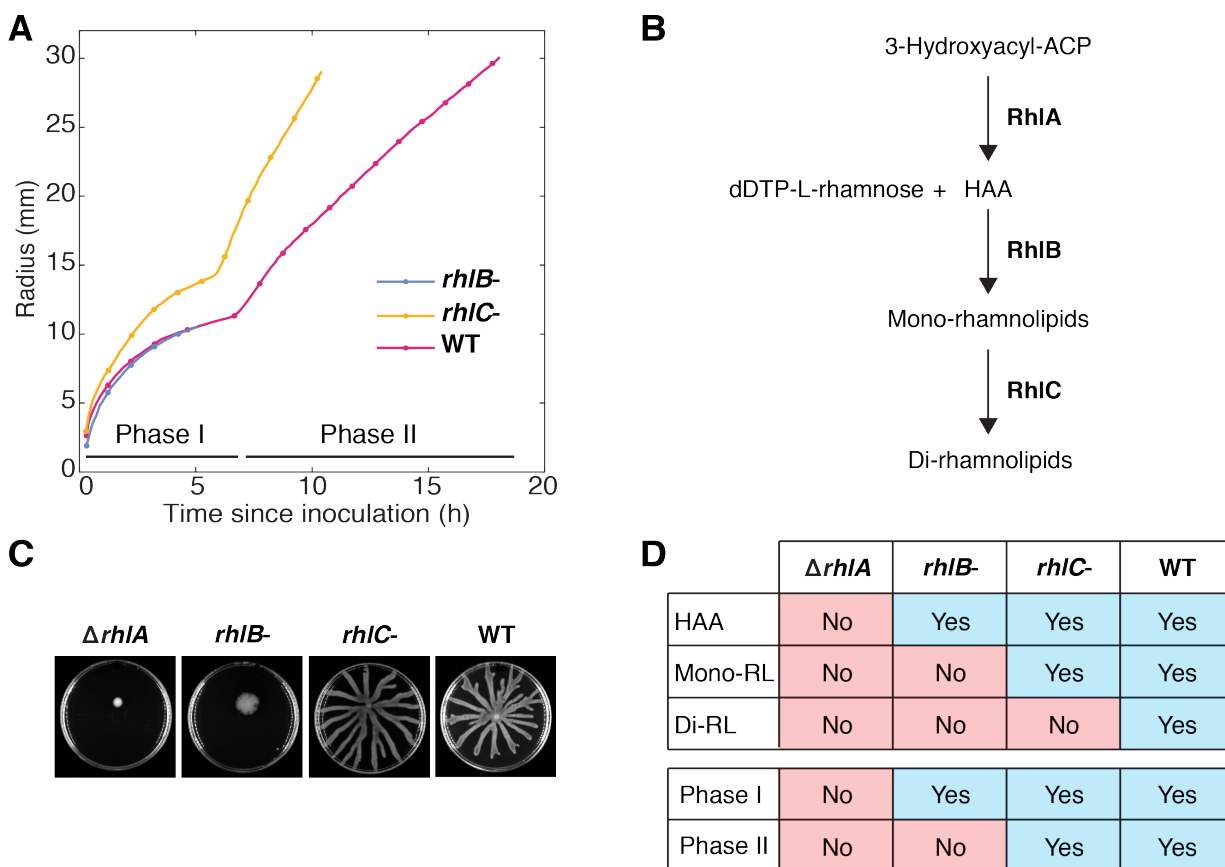

Figure S4: A: Position of the swelling front with respect to time, for *rhIB*<sup>-</sup>, *rhIC*<sup>-</sup>, and WT colonies. B: Biosynthesis pathway of rhamnolipids, in three steps, involving RhIA, RhIB, and RhIC proteins. C: Swarming colony for the four strains, 24 hours after inoculation. D: Summary table comparing rhamnolipid secretion capabilities of the four tested strains, with the presence of Phase I and Phase II in curves from panel A.

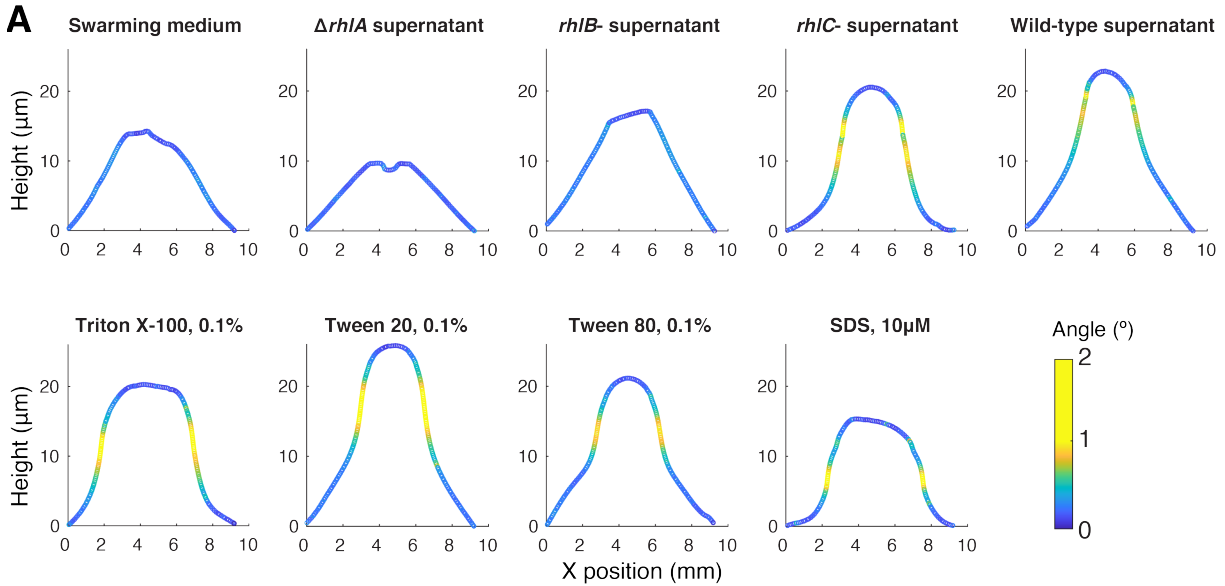

**B**

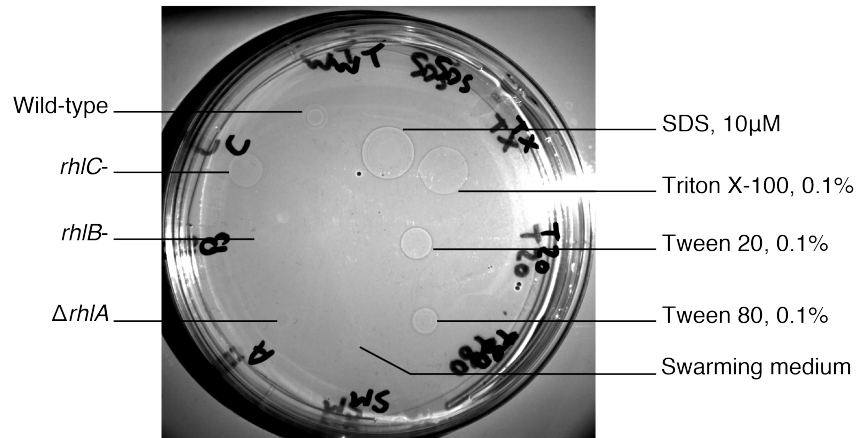

Figure S5: A: Profiles of the gel surface obtained with an optical profilometer, 5 minutes after deposition of a  $1\mu\text{L}$  droplet. Nine samples were tested: Swarming medium (i.e. media use for swarming plates, minus agar), supernatants of  $\Delta rhIA$ ,  $rhIB^-$ ,  $rhIC^-$ , and wild-type culture in swarming media, and four synthetic surfactants: Triton X-100, Tween 20, Tween 80, and SDS. Note the vertical scale is approximately enlarged 1000-fold compared to the horizontal scale: the gel remains very flat in all conditions, except in regions corresponding to the swelling fronts, highlighted here in yellow, where the curve slope is greater than  $1^\circ$ . B: Shadowgraph of an agar plate, taken 20 min after deposition of  $2\mu\text{L}$  droplets of the 9 tested samples. Only the four synthetic surfactants and the supernatants of wild-type and  $rhIC^-$  cultures yield to a swelling front. Swarming medium, and supernatants of  $\Delta rhIA$  and  $rhIB^-$  do not induce a swelling front.

**A. Thickness range:**

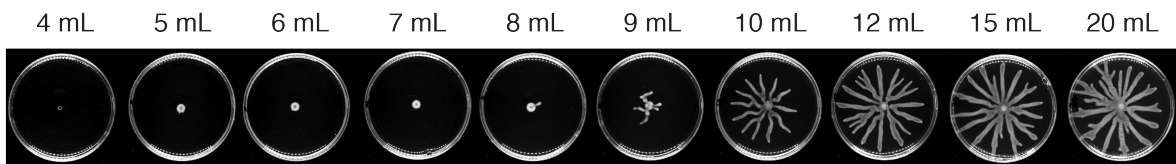

**B. Nutrient range:**

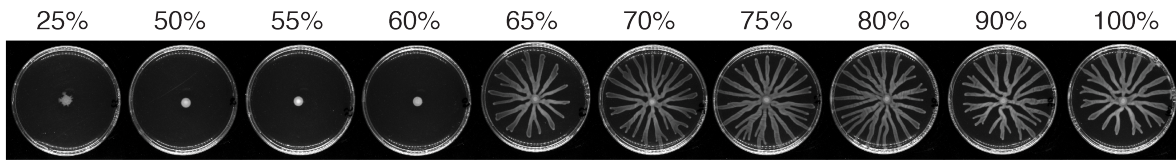

Figure S6: A: Snapshots of swarming colonies grown on gels of various thickness, expressed as volume of agar gel in the plate. 20 mL is the nominal volume, and corresponds to a thickness of 3.5 mm. B: Snapshot of swarming colonies grown on a gel containing various concentration of nutrients (casa-aminoacids). The nominal concentration is 12.5 g/L. Concentrations are expressed as a percentage of this nominal concentration. Note the change of final colony size is abrupt between 60% and 65% concentrations of nutrients, while the change is more gradual between 8 mL and 12 mL volumes. All snapshots were taken 22 hours after inoculation.

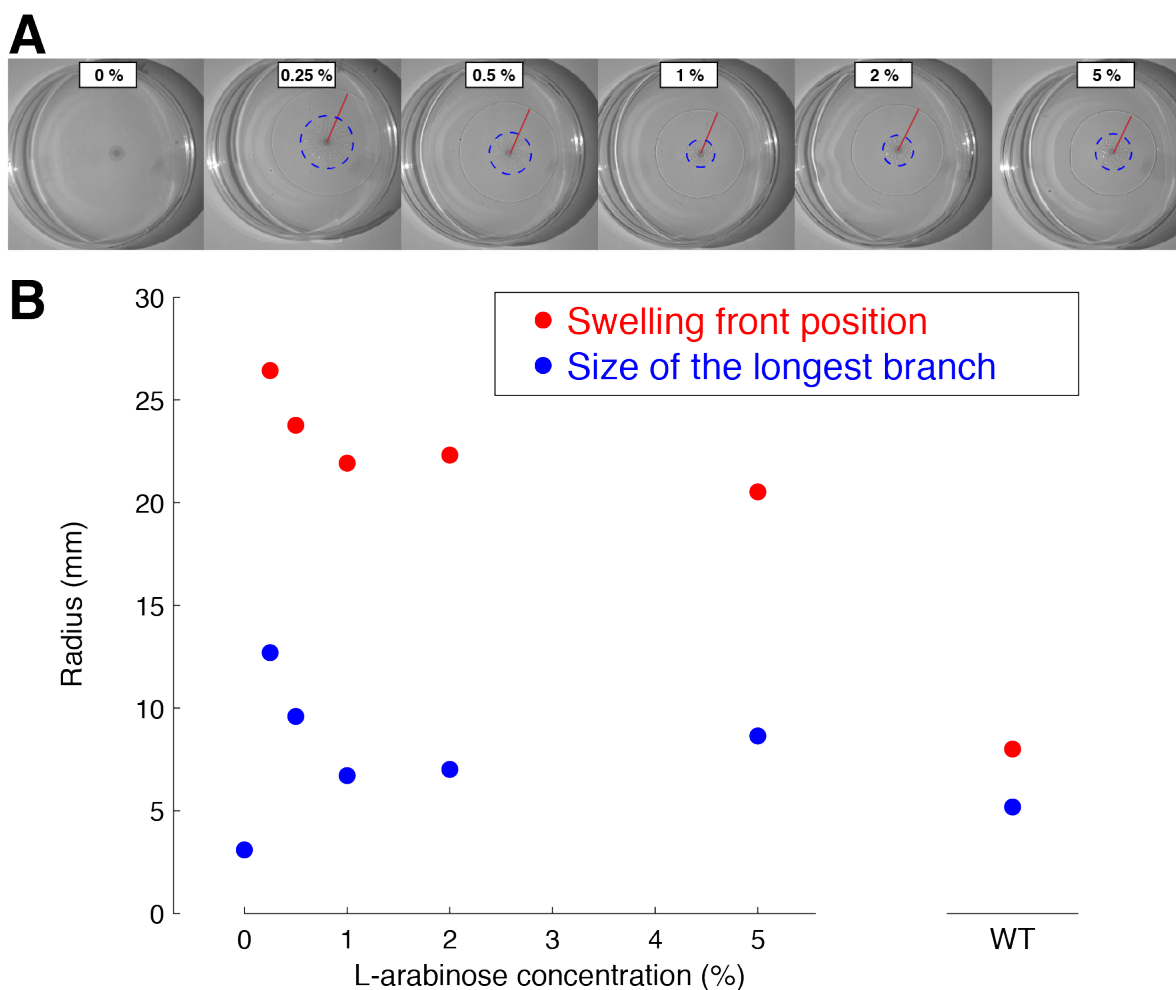

Figure S7: A: Shadowgraphy snapshots, taken 8 hours after inoculation, of  $\Delta rhlA:P_{BAD}rhlAB$  colonies growing on agar gel plates supplemented with varying concentrations of L-arabinose. The distance between the inoculation point and the swelling front is highlighted in red, the longest branch of the colony sets the radius of the dashed circle. B: Position of the swelling front (red dots) and colony sizes (blue dots) are reported with respect to L-arabinose concentration. For comparison, swelling front position and colony size for a wild-type colony 8 hours after inoculation are also reported. The concentration of 1% of L-arabinose, chosen for all rescue experiments, corresponds to the smallest colony size while maintaining an abundant production of rhamnolipids (evaluated by the position of the swelling front).

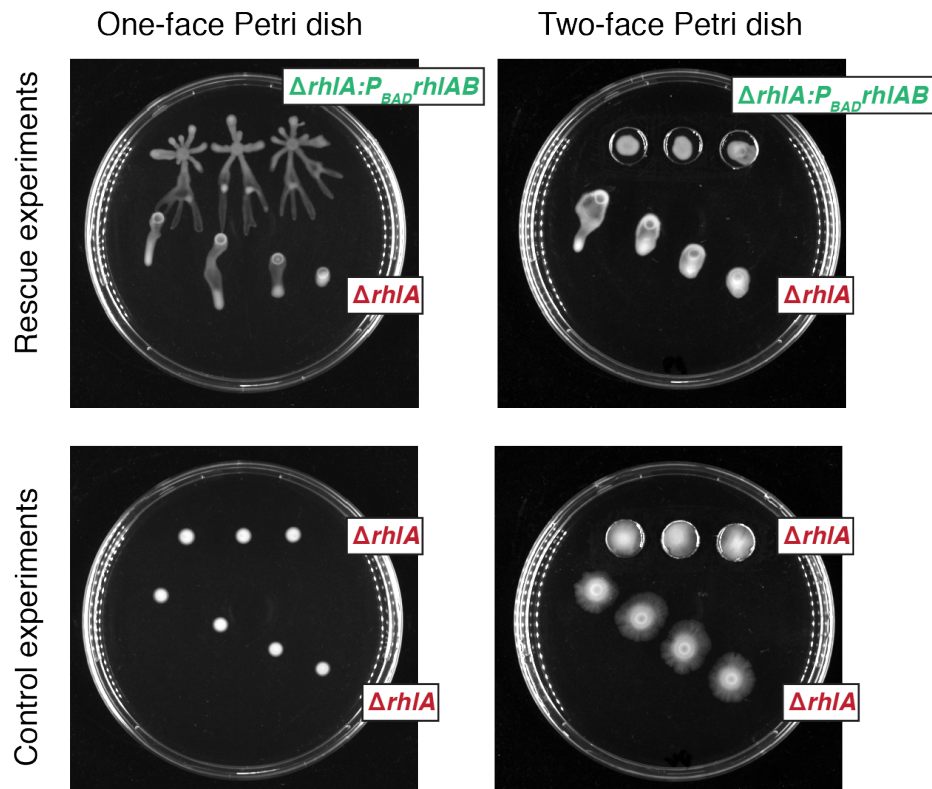

Figure S8: Rescue experiments (top) and control experiments (bottom). Left: on one-face Petri dish. Right: on two-face Petri dish.  $\Delta rhIA$  colonies are unable to swarm by themselves. They are rescued using rhamnolipids provided by  $\Delta rhIA:P_{BAD}rhIAB$  colonies. When facing another  $\Delta rhIA$  colony, they are not rescued. Snapshots were taken 15 hours after inoculation for one-face Petri dish, 36 hours after inoculation for two-face Petri dish.

2

## Supplementary Movies

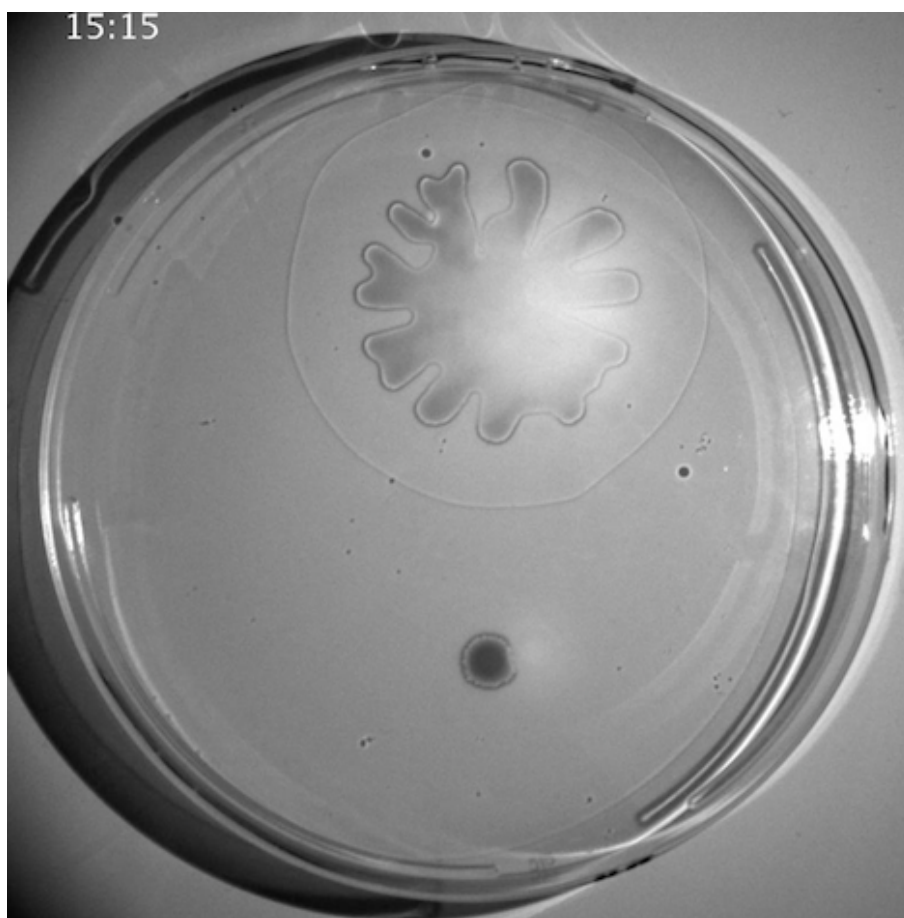

Movie S1: Wild-type vs  $\Delta rhlA$  swarming colonies captured in shadowgraphy



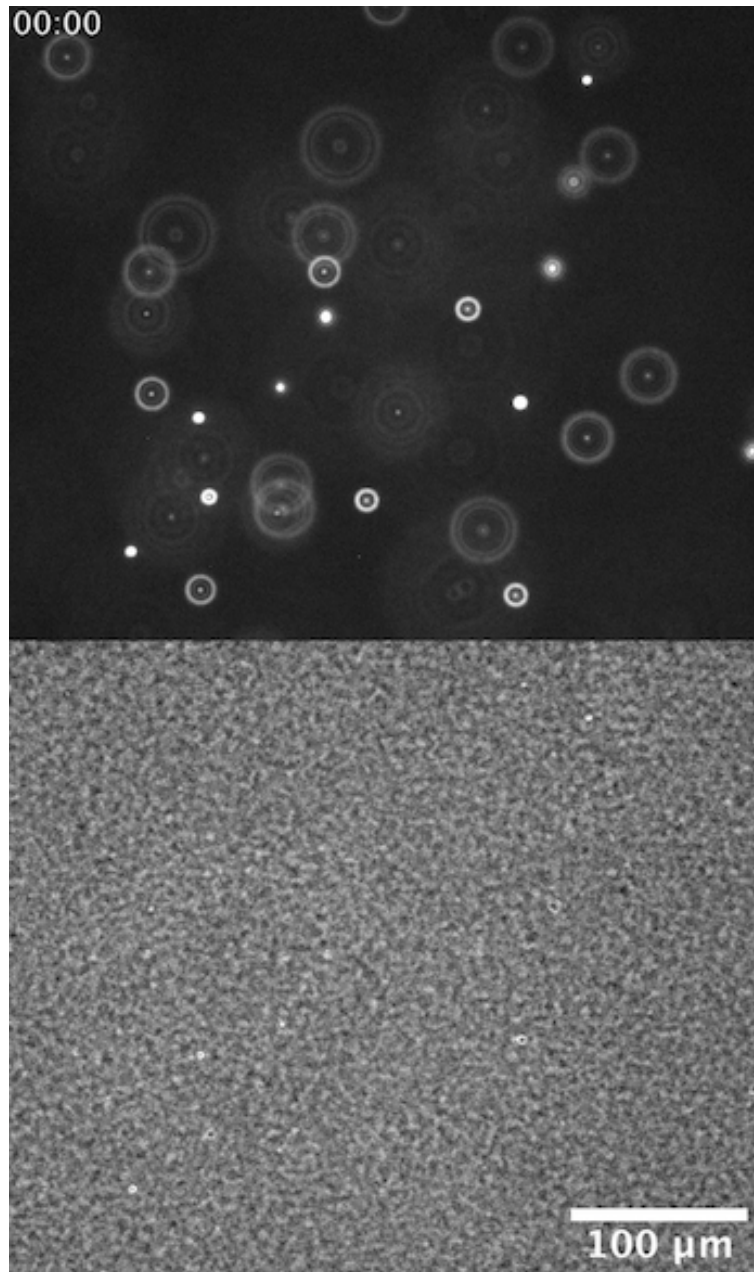

Movie S2: Timelapse video of 1  $\mu\text{m}$  fluorescent beads embedded into the agar gel. Top: fluorescence image. Bottom: phase contrast image. The swelling front passing in the field of view (from left to right) is visible as a white halo in the phase contrast image, from  $t=4$  min to  $t=15$  min.

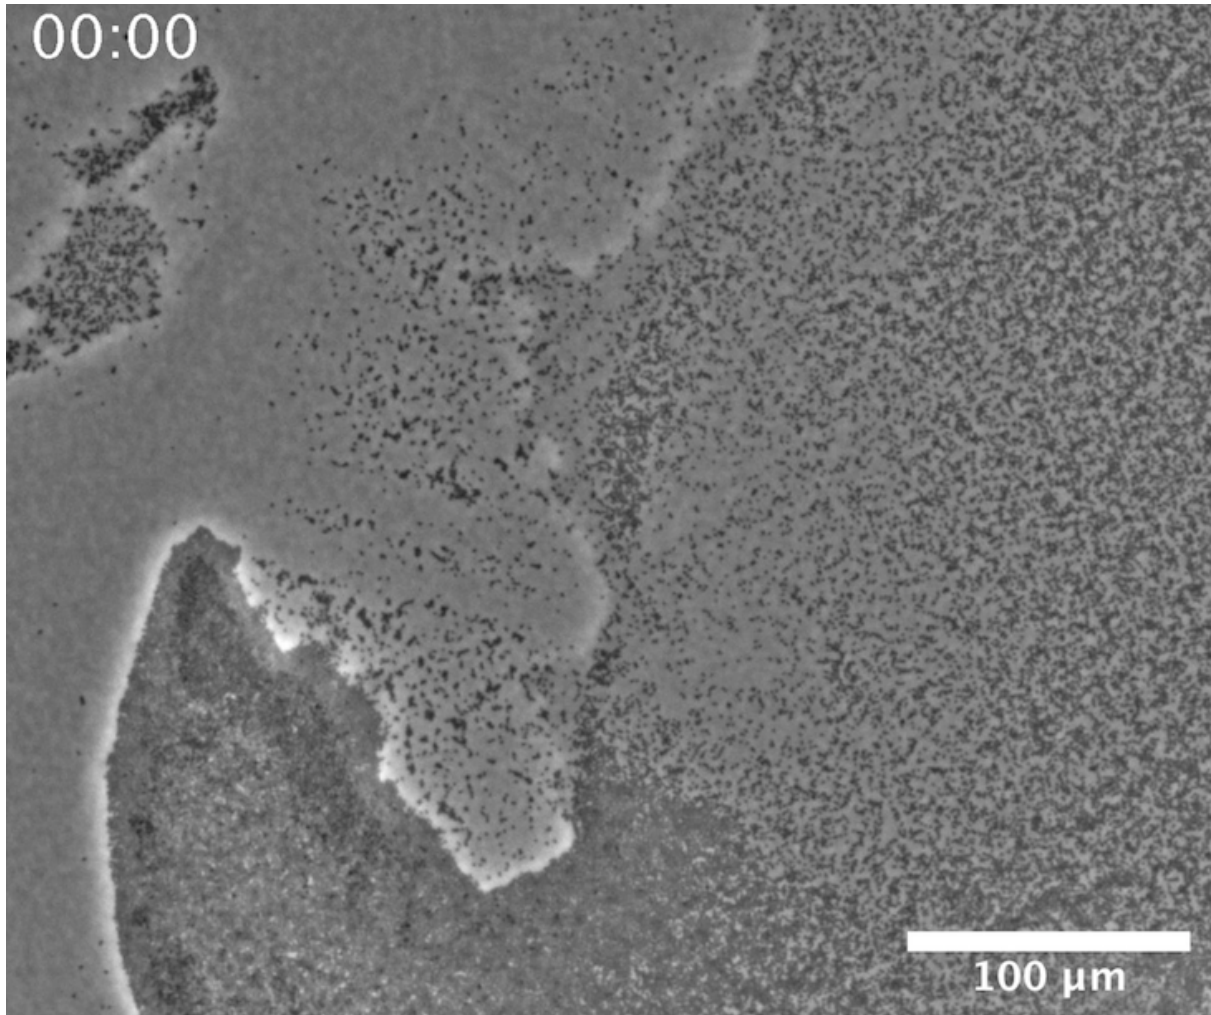

Movie S3: Timelapse video of  $\Delta rhlA$  cells motility on agar gel. The swelling front passes through the field of view at  $t=20$  min, from the left side to the right side.

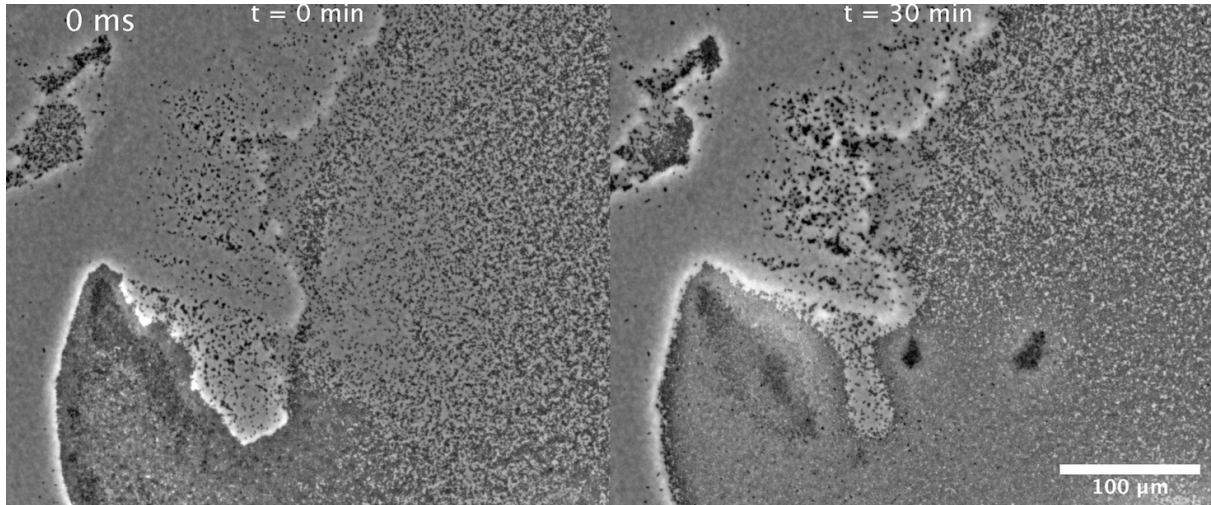

Movie S4: One second long videos of  $\Delta rhlA$  cells motility on agar gel. Left: t=0 min, before passage of the swelling front. Right: t=30 min, after passage of the swelling front.

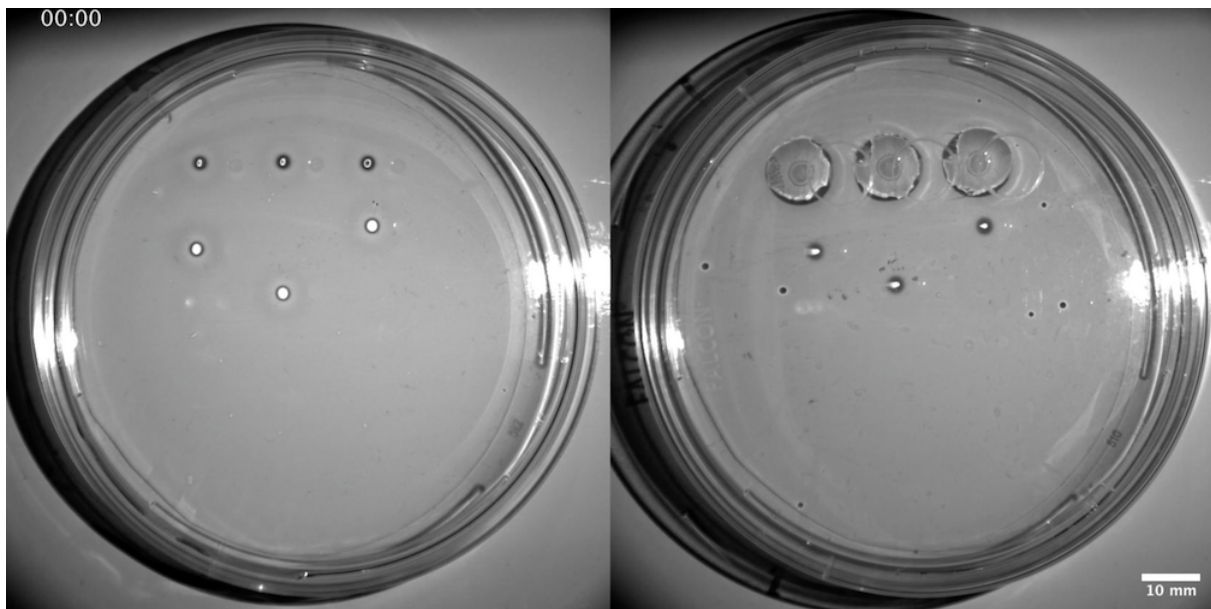

Movie S5: Left: Rescue experiment on a regular one-face swarming plate. Right: Rescue experiment on a two-face swarming plate. In both cases, three  $\Delta rhlA$  colonies, unable to swarm by themselves, are rescued using rhamnolipids provided by three  $\Delta rhlA:P_{BAD}rhlAB$  colonies grown at a distance (ranging from 7 to 23 mm). On the two-face plate,  $\Delta rhlA:P_{BAD}rhlAB$  colonies are grown on the second face, within holes. On the one-face plate,  $\Delta rhlA:P_{BAD}rhlAB$  colonies are grown on the same face as the  $\Delta rhlA$  colonies. Note that the left and center  $\Delta rhlA$  colonies start swarming before the  $\Delta rhlA:P_{BAD}rhlAB$  colonies reached them (respectively 90 minutes and 140 minutes). Full movie duration is 20 hours.
